# Supplementary material for: Energy use and its contributors in hotel buildings: A systematic review and meta-analysis
Source: PubMed Central journal article supplement (PMC11500959; doi:10.1371/journal.pone.0309745), 2024-10-24

## 1. Floor Area

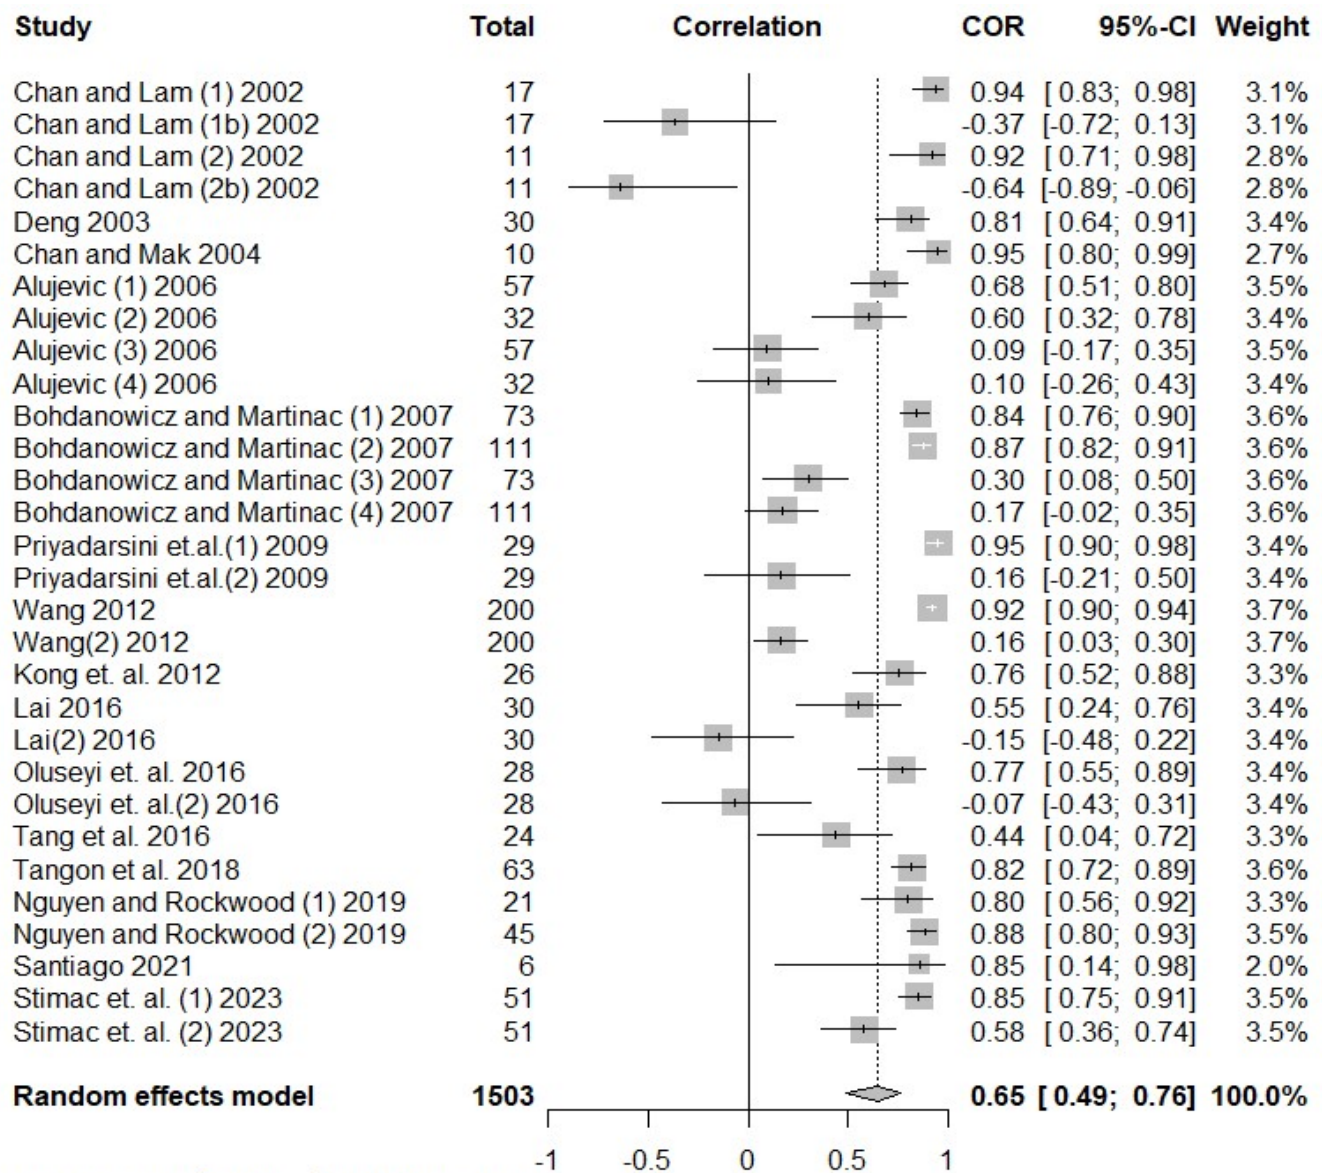

Heterogeneity:  $I^2 = 95\%$ ,  $\tau^2 = 0.3852$ ,  $p < 0.01$

## 2. Guestrooms

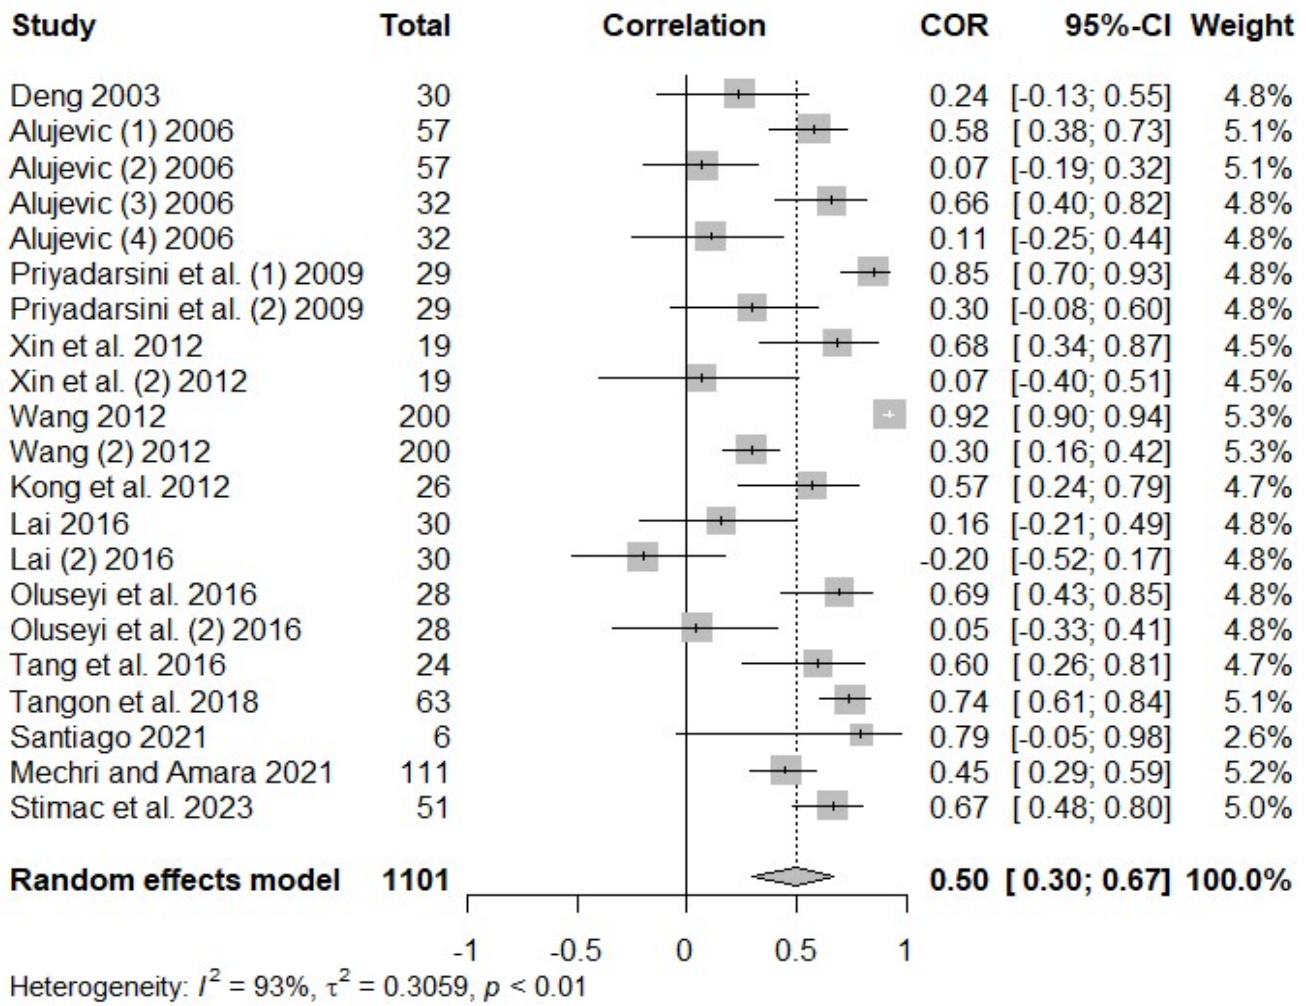

## 3. Construction Year

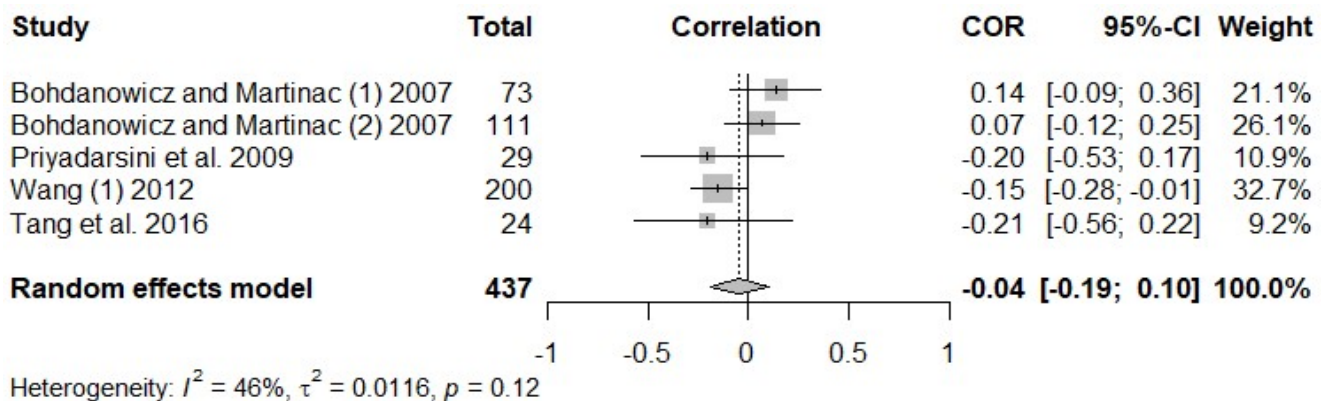

4. Star Level

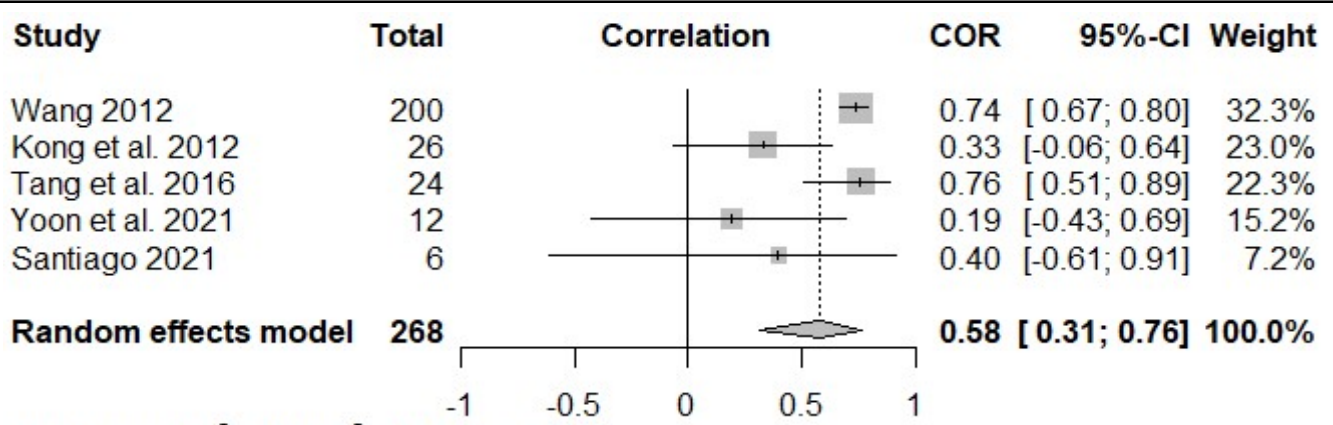

5. Number of Floors

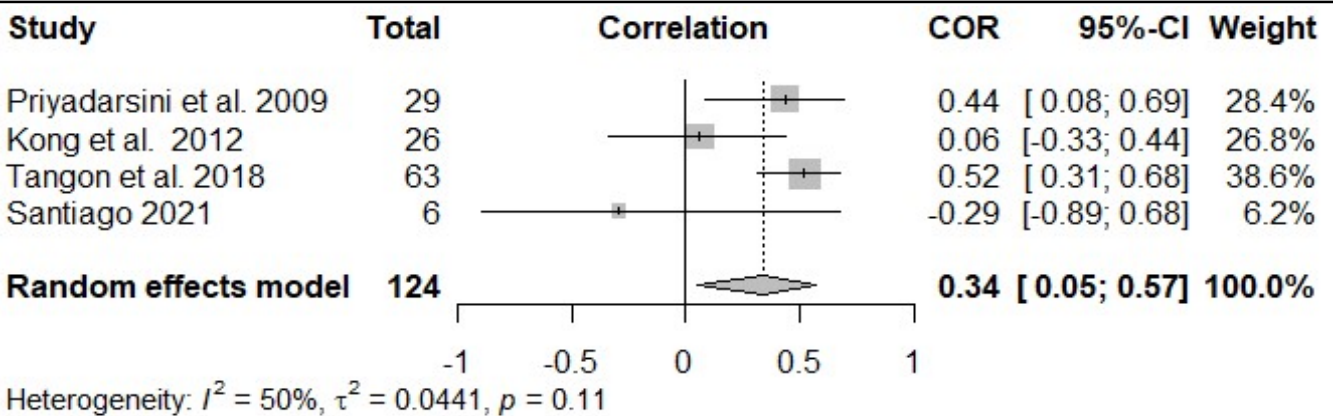

6. Building Age

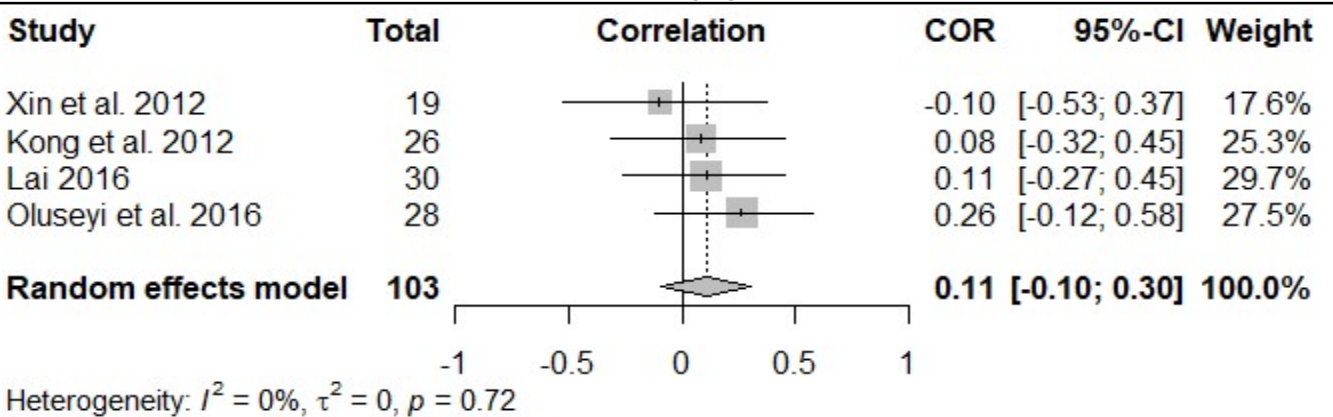

7. Guestrooms Area

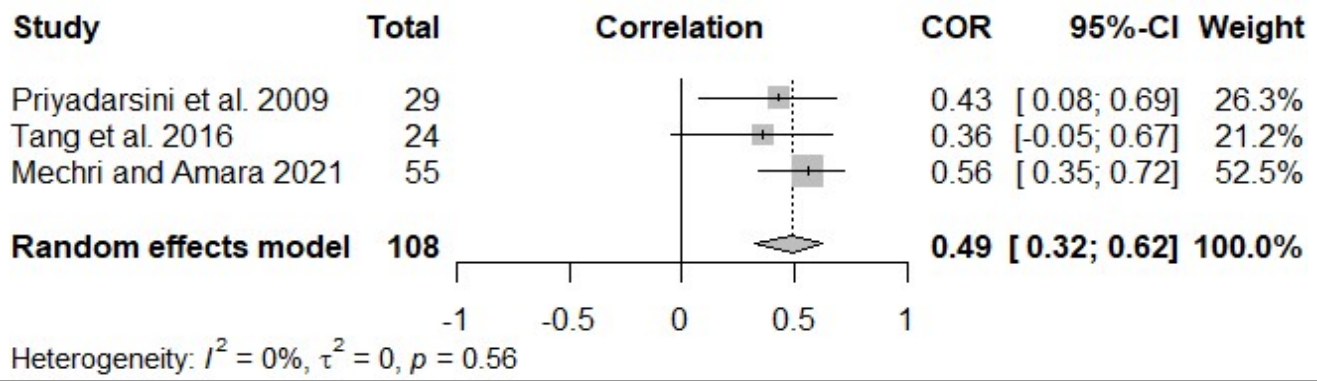

8. Retrofit

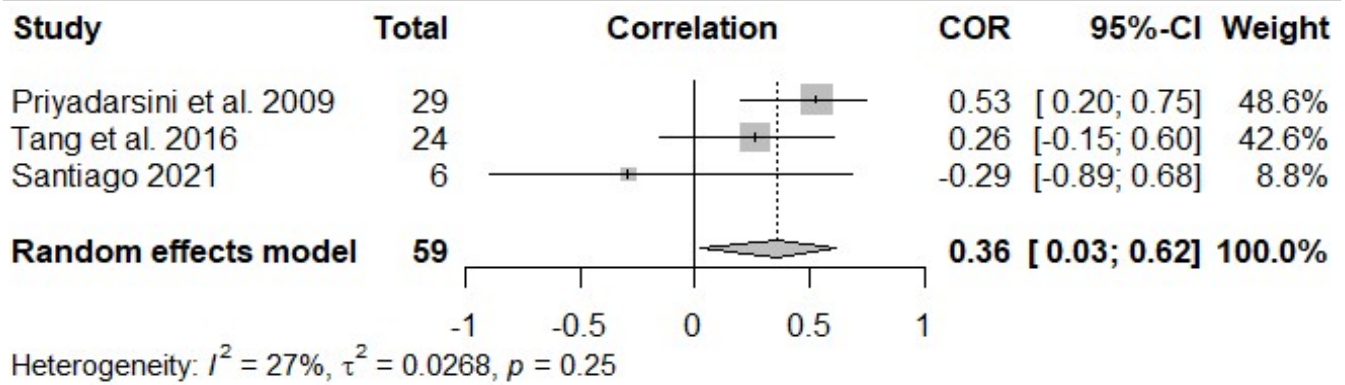

9. Occupancy

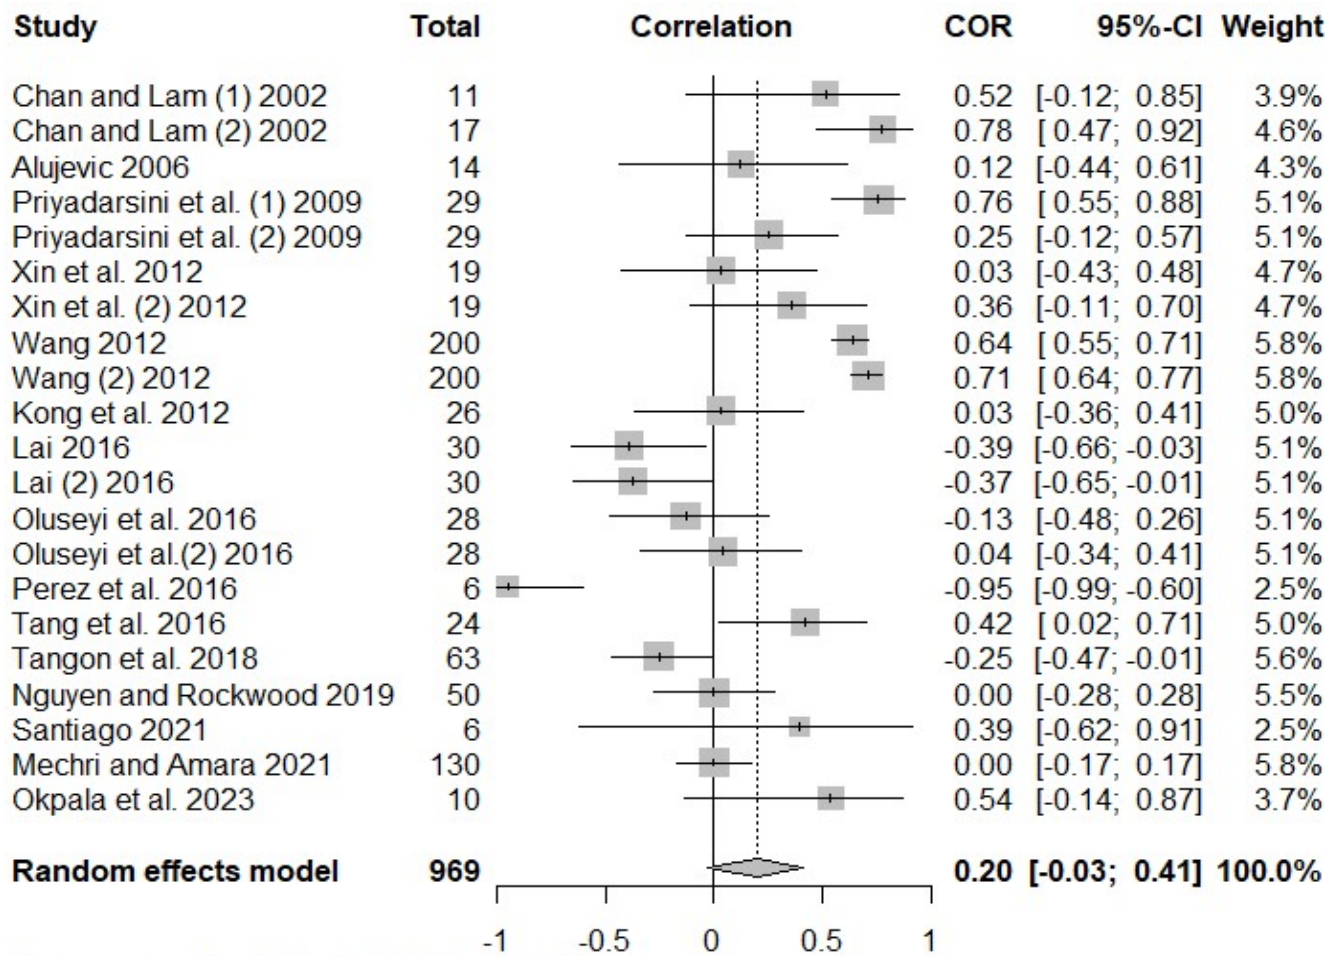

Heterogeneity:  $I^2 = 90\%$ ,  $\tau^2 = 0.2384$ ,  $p < 0.01$

10. Guest-nights

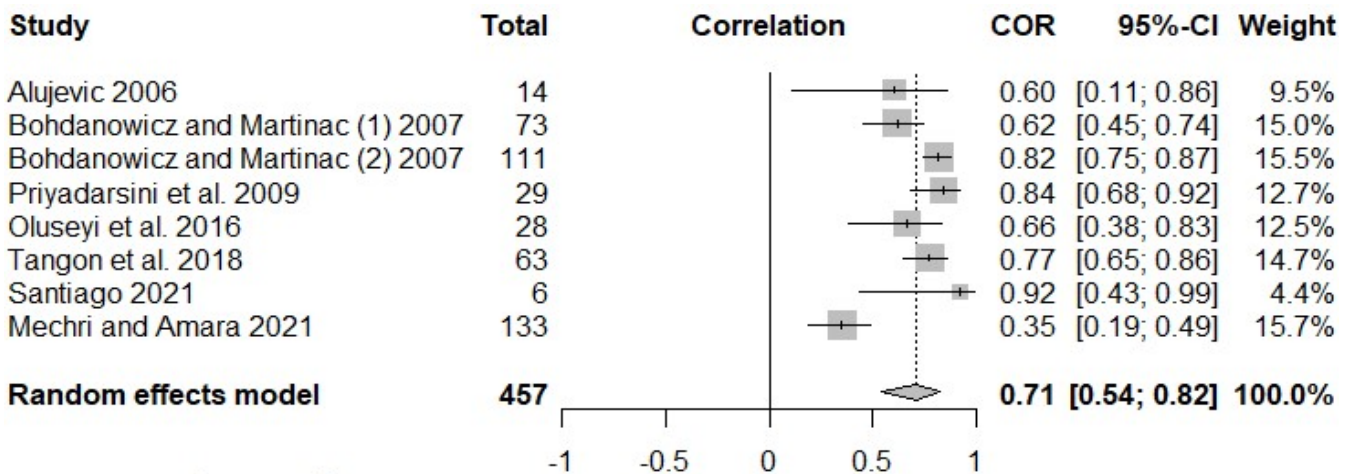

Heterogeneity:  $I^2 = 85\%$ ,  $\tau^2 = 0.1188$ ,  $p < 0.01$

11. Number of guests

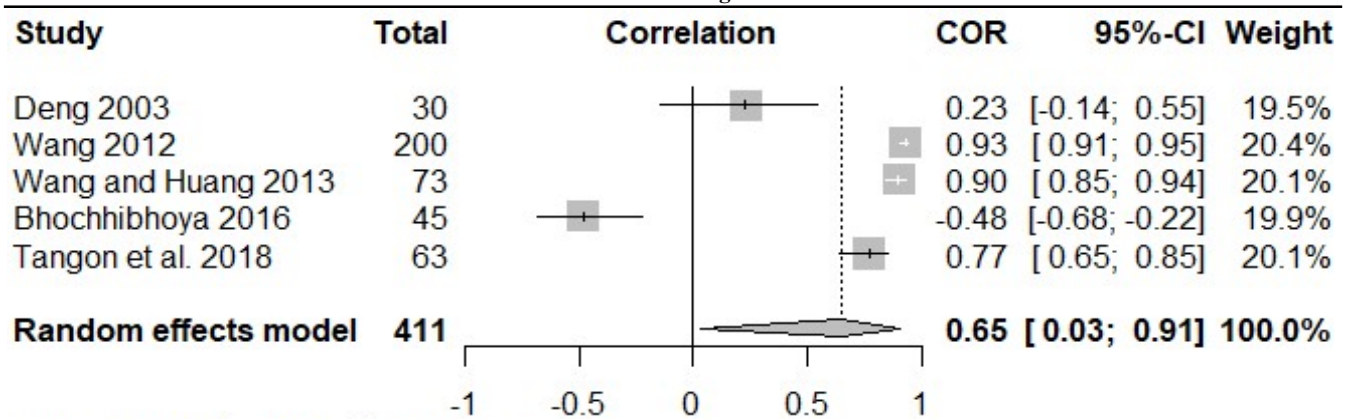

Heterogeneity:  $I^2 = 98\%$ ,  $\tau^2 = 0.7159$ ,  $p < 0.01$

12. Food covers

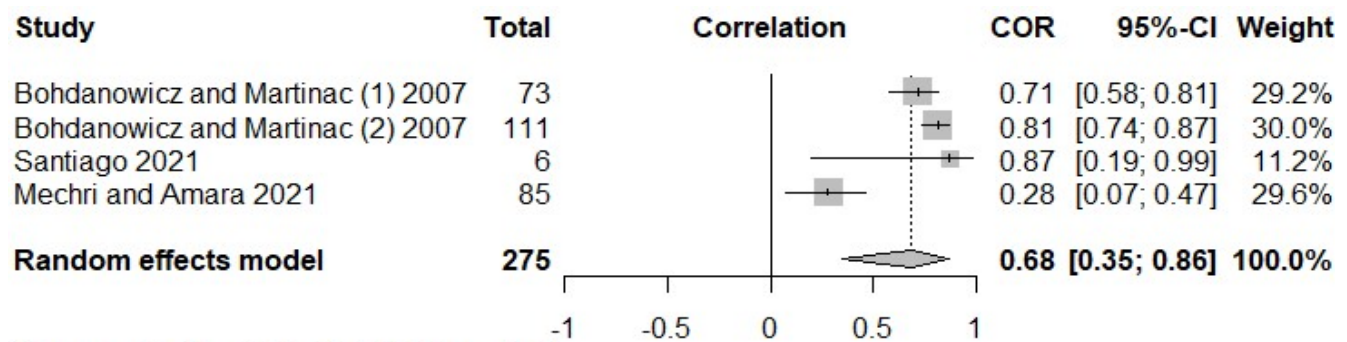

Heterogeneity:  $I^2 = 91\%$ ,  $\tau^2 = 0.1832$ ,  $p < 0.01$

13. Room Revenue

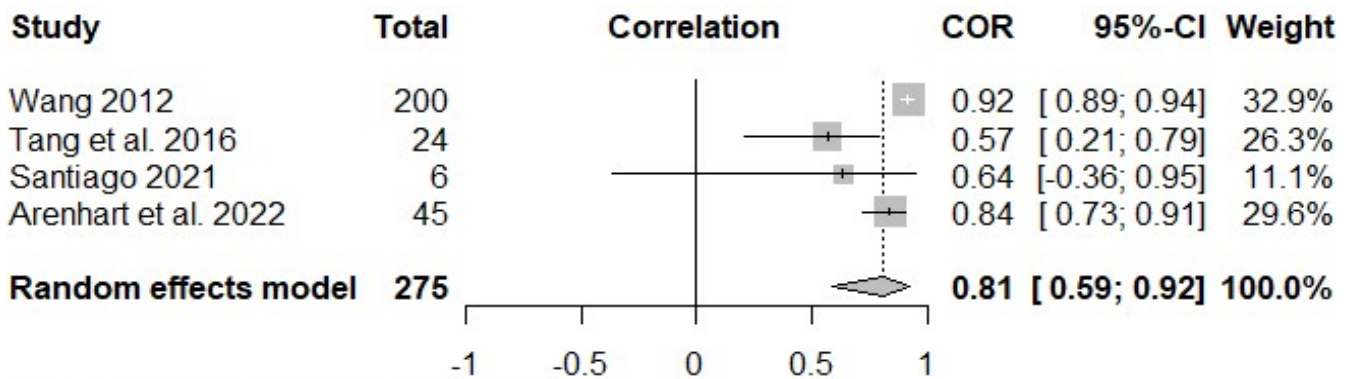

Heterogeneity:  $I^2 = 85\%$ ,  $\tau^2 = 0.1628$ ,  $p < 0.01$

14. Number of Employees

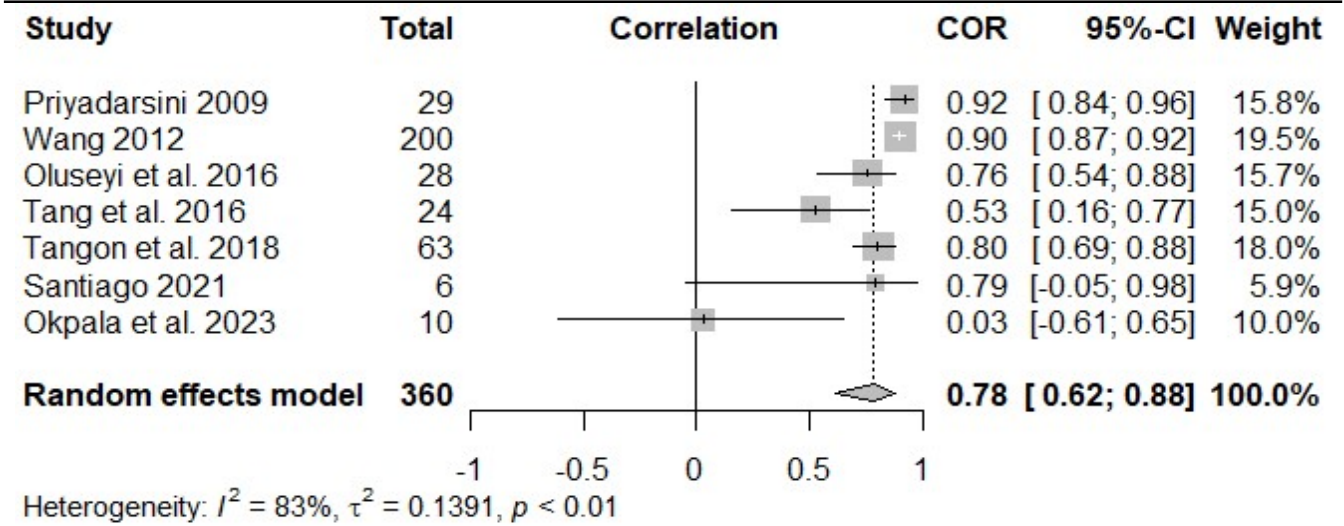

15. Employees Density

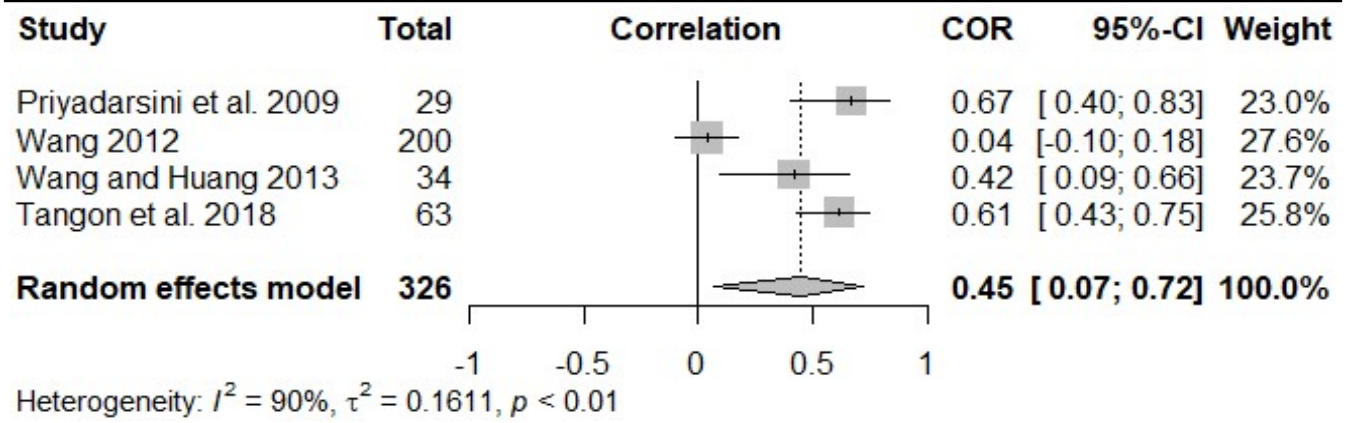

16. Outdoor temperature

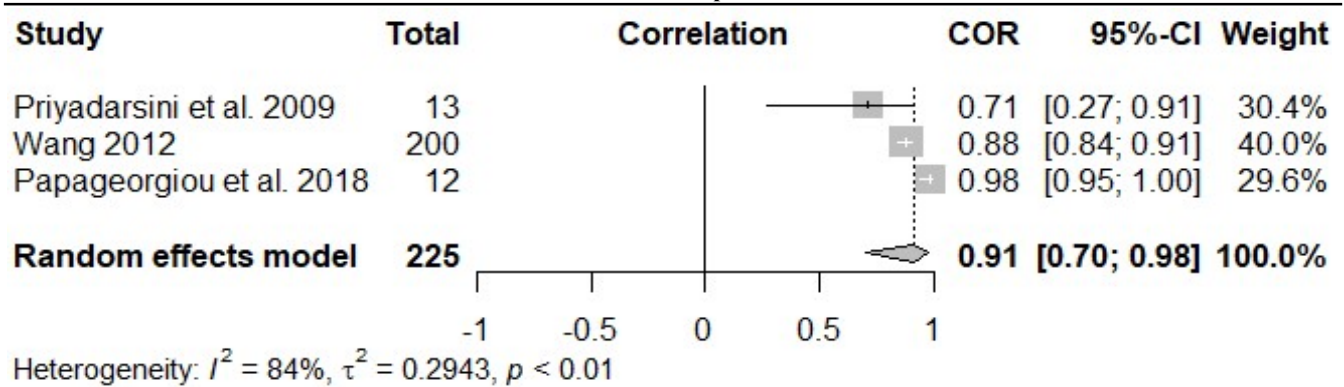

17. Carbon Emissions

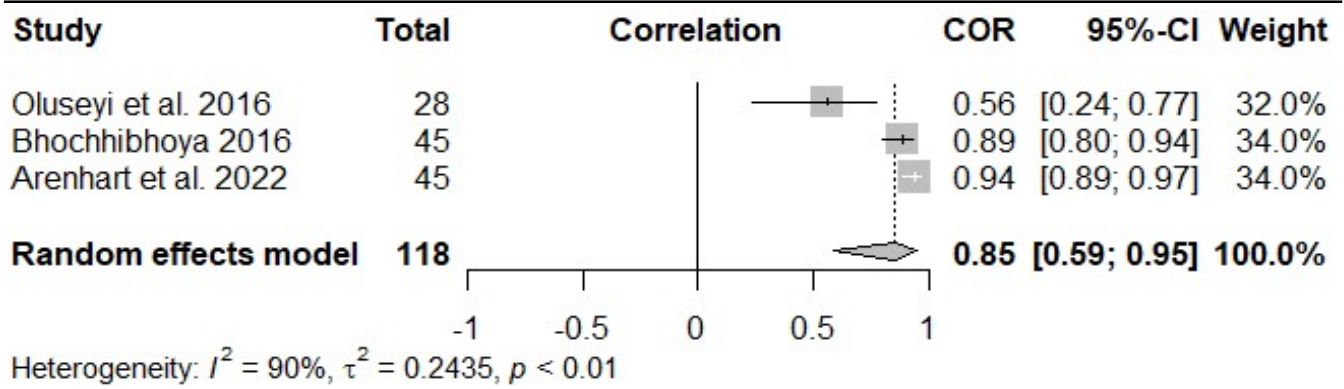

18. Water Use

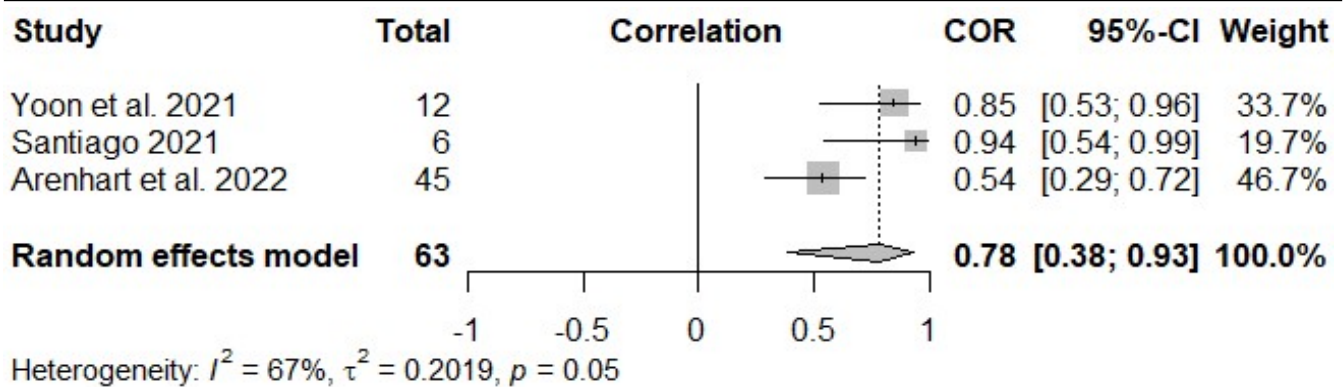

Supplement: pone.0309745.s008.pdf [file pone.0309745.s008.pdf]
