# Supplementary material for: Energy use and its contributors in hotel buildings: A systematic review and meta-analysis
Source: PubMed Central journal article supplement (PMC11500959; doi:10.1371/journal.pone.0309745), 2024-10-24
Supplement: pone.0309745.s002.pdf [file pone.0309745.s002.pdf]

S2 Table. Information about each included study

| Number | Authors                                                                   | Publication Year | Source                                          | Study Region      | Latitude (centre) | Longitude (centre) | Sample size | Study Period | Theory-driven                                            | Analysis design                                                                        | Variables                     | Correlation Coefficient | p-value | Hotels category | Contribution                 | Data type      | Mean energy use | Energy data unit         | Energy data type | Data extractor responsible | Date of extraction                  | Included or not included in meta-analysis                        |
|--------|---------------------------------------------------------------------------|------------------|-------------------------------------------------|-------------------|-------------------|--------------------|-------------|--------------|----------------------------------------------------------|----------------------------------------------------------------------------------------|-------------------------------|-------------------------|---------|-----------------|------------------------------|----------------|-----------------|--------------------------|------------------|----------------------------|-------------------------------------|------------------------------------------------------------------|
| 1      | Silu Bhoelchibhoya, Massimo Pizzol, Francesco Marinello, Raffaele Cavalli | 2020             | Journal of Cleaner Production                   | Solukhumbu, Nepal | 27.74             | 86.73              | 45          | 2014         | Life Cycle Assessment (LCA) and Life Cycle Costing (LCC) | ANOVA and Correlation Analysis                                                         | Carbon emissions construction | NA                      | NA      | General         | Data is from study 20        | Secondary data | 10.74           | kWh/Person.Night         | EUI              | R.S.A., T.M., and R.M.U.   | 27th October to 11th November, 2023 | Not used in meta-analysis due duplicated data                    |
| 1      | Silu Bhoelchibhoya, Massimo Pizzol, Francesco Marinello, Raffaele Cavalli | 2020             | Journal of Cleaner Production                   | Solukhumbu, Nepal | 27.74             | 86.73              | 45          | 2014         | Life Cycle Assessment (LCA) and Life Cycle Costing (LCC) | ANOVA and Correlation Analysis                                                         | Carbon emission operation     | NA                      | NA      | General         | Data is from study 20        | Secondary data | 10.74           | kWh/Person.Night         | EUI              | R.S.A., T.M., and R.M.U.   | 27th October to 11th November, 2023 | Not used in meta-analysis due duplicated data                    |
| 1      | Silu Bhoelchibhoya, Massimo Pizzol, Francesco Marinello, Raffaele Cavalli | 2020             | Journal of Cleaner Production                   | Solukhumbu, Nepal | 27.74             | 86.73              | 45          | 2014         | Life Cycle Assessment (LCA) and Life Cycle Costing (LCC) | ANOVA and Correlation Analysis                                                         | Carbon emissions replacement  | NA                      | NA      | General         | Data is from study 20        | Secondary data | 10.74           | kWh/Person.Night         | EUI              | R.S.A., T.M., and R.M.U.   | 27th October to 11th November, 2023 | Not used in meta-analysis due duplicated data                    |
| 1      | Silu Bhoelchibhoya, Massimo Pizzol, Francesco Marinello, Raffaele Cavalli | 2020             | Journal of Cleaner Production                   | Solukhumbu, Nepal | 27.74             | 86.73              | 45          | 2014         | Life Cycle Assessment (LCA) and Life Cycle Costing (LCC) | ANOVA and Correlation Analysis                                                         | carbon emissions              | NA                      | NA      | General         | Data is from study 20        | Secondary data | 10.74           | kWh/Person.Night         | EUI              | R.S.A., T.M., and R.M.U.   | 27th October to 11th November, 2023 | Not used in meta-analysis due duplicated data                    |
| 1      | Silu Bhoelchibhoya, Massimo Pizzol, Francesco Marinello, Raffaele Cavalli | 2020             | Journal of Cleaner Production                   | Solukhumbu, Nepal | 27.74             | 86.73              | 45          | 2014         | Life Cycle Assessment (LCA) and Life Cycle Costing (LCC) | ANOVA and Correlation Analysis                                                         | Construction cost             | NA                      | NA      | General         | Data is from study 20        | Secondary data | 10.74           | kWh/Person.Night         | EUI              | R.S.A., T.M., and R.M.U.   | 27th October to 11th November, 2023 | Not used in meta-analysis due duplicated data                    |
| 1      | Silu Bhoelchibhoya, Massimo Pizzol, Francesco Marinello, Raffaele Cavalli | 2020             | Journal of Cleaner Production                   | Solukhumbu, Nepal | 27.74             | 86.73              | 45          | 2014         | Life Cycle Assessment (LCA) and Life Cycle Costing (LCC) | ANOVA and Correlation Analysis                                                         | Operation cost                | NA                      | NA      | General         | Data is from study 20        | Secondary data | 10.74           | kWh/Person.Night         | EUI              | R.S.A., T.M., and R.M.U.   | 27th October to 11th November, 2023 | Not used in meta-analysis due duplicated data                    |
| 1      | Silu Bhoelchibhoya, Massimo Pizzol, Francesco Marinello, Raffaele Cavalli | 2020             | Journal of Cleaner Production                   | Solukhumbu, Nepal | 27.74             | 86.73              | 45          | 2014         | Life Cycle Assessment (LCA) and Life Cycle Costing (LCC) | ANOVA and Correlation Analysis                                                         | Maintenance cost replacement  | NA                      | NA      | General         | Data is from study 20        | Secondary data | 10.74           | kWh/Person.Night         | EUI              | R.S.A., T.M., and R.M.U.   | 27th October to 11th November, 2023 | Not used in meta-analysis due duplicated data                    |
| 1      | Silu Bhoelchibhoya, Massimo Pizzol, Francesco Marinello, Raffaele Cavalli | 2020             | Journal of Cleaner Production                   | Solukhumbu, Nepal | 27.74             | 86.73              | 45          | 2014         | Life Cycle Assessment (LCA) and Life Cycle Costing (LCC) | ANOVA and Correlation Analysis                                                         | custo total                   | NA                      | NA      | General         | Data is from study 20        | Secondary data | 10.74           | kWh/Person.Night         | EUI              | R.S.A., T.M., and R.M.U.   | 27th October to 11th November, 2023 | Not used in meta-analysis due duplicated data                    |
| 1      | Silu Bhoelchibhoya, Massimo Pizzol, Francesco Marinello, Raffaele Cavalli | 2020             | Journal of Cleaner Production                   | Solukhumbu, Nepal | 27.74             | 86.73              | 45          | 2014         | Life Cycle Assessment (LCA) and Life Cycle Costing (LCC) | ANOVA and Correlation Analysis                                                         | Loss rate                     | NA                      | NA      | General         | Data is from study 20        | Secondary data | 10.74           | kWh/Person.Night         | EUI              | R.S.A., T.M., and R.M.U.   | 27th October to 11th November, 2023 | Not used in meta-analysis due duplicated data                    |
| 1      | Silu Bhoelchibhoya, Massimo Pizzol, Francesco Marinello, Raffaele Cavalli | 2020             | Journal of Cleaner Production                   | Solukhumbu, Nepal | 27.74             | 86.73              | 45          | 2014         | Life Cycle Assessment (LCA) and Life Cycle Costing (LCC) | ANOVA and Correlation Analysis                                                         | Tourist number                | NA                      | NA      | General         | Data is from study 20        | Secondary data | 10.74           | kWh/Person.Night         | EUI              | R.S.A., T.M., and R.M.U.   | 27th October to 11th November, 2023 | Not used in meta-analysis due duplicated data                    |
| 1      | Silu Bhoelchibhoya, Massimo Pizzol, Francesco Marinello, Raffaele Cavalli | 2020             | Journal of Cleaner Production                   | Solukhumbu, Nepal | 27.74             | 86.73              | 45          | 2014         | Life Cycle Assessment (LCA) and Life Cycle Costing (LCC) | ANOVA and Correlation Analysis                                                         | Building area                 | NA                      | NA      | General         | Data is from study 20        | Secondary data | 10.74           | kWh/Person.Night         | EUI              | R.S.A., T.M., and R.M.U.   | 27th October to 11th November, 2023 | Not used in meta-analysis due duplicated data                    |
| 2      | Hyeyim Yoon, David Sauri, Antonio Rico                                    | 2021             | Current Issues in Tourism                       | Benidorm, Spain   | 38.54             | -0.13              | 12          | 2017 - 2018  | Water-energy Nexus (WEN)                                 | Descriptive Statistics and Spearman correlations                                       | water use                     | 0.85                    | <0.01   | General         | Main Study                   | Primary data   | 536.84          | kWh/m <sup>2</sup>       | EUI              | R.S.A., T.M., and R.M.U.   | 27th October to 11th November, 2023 | Used in meta-analysis                                            |
| 2      | Hyeyim Yoon, David Sauri, Antonio Rico                                    | 2021             | Current Issues in Tourism                       | Benidorm, Spain   | 38.54             | -0.13              | 12          | 2017 - 2018  | Water-energy Nexus (WEN)                                 | Descriptive Statistics and Spearman correlations                                       | restaurants                   | 0.65                    | <0.05   | General         | Main Study                   | Primary data   | 536.84          | kWh/m <sup>2</sup>       | EUI              | R.S.A., T.M., and R.M.U.   | 27th October to 11th November, 2023 | Not used in meta-analysis due number of effect sizes less than 3 |
| 2      | Hyeyim Yoon, David Sauri, Antonio Rico                                    | 2021             | Current Issues in Tourism                       | Benidorm, Spain   | 38.54             | -0.13              | 12          | 2017 - 2018  | Water-energy Nexus (WEN)                                 | Descriptive Statistics and Spearman correlations                                       | Garden area                   | 0.23                    | >0.10   | General         | Main Study                   | Primary data   | 536.84          | kWh/m <sup>2</sup>       | EUI              | R.S.A., T.M., and R.M.U.   | 27th October to 11th November, 2023 | Not used in meta-analysis due number of effect sizes less than 3 |
| 2      | Hyeyim Yoon, David Sauri, Antonio Rico                                    | 2021             | Current Issues in Tourism                       | Benidorm, Spain   | 38.54             | -0.13              | 12          | 2017 - 2018  | Water-energy Nexus (WEN)                                 | Descriptive Statistics and Spearman correlations                                       | rank of overnight             | 0.72                    | <0.01   | General         | Main Study                   | Primary data   | 536.84          | kWh/m <sup>2</sup>       | EUI              | R.S.A., T.M., and R.M.U.   | 27th October to 11th November, 2023 | Not used in meta-analysis due number of effect sizes less than 3 |
| 2      | Hyeyim Yoon, David Sauri, Antonio Rico                                    | 2021             | Current Issues in Tourism                       | Benidorm, Spain   | 38.54             | -0.13              | 12          | 2017 - 2018  | Water-energy Nexus (WEN)                                 | Descriptive Statistics and Spearman correlations                                       | Category (star level)         | 0.19                    | >0.10   | General         | Main Study                   | Primary data   | 536.84          | kWh/m <sup>2</sup>       | EUI              | R.S.A., T.M., and R.M.U.   | 27th October to 11th November, 2023 | Used in meta-analysis                                            |
| 3      | Rodrigo Schons Arenhart, Adriano Mendonça Souza, Roselaine Raviaro Zanini | 2022             | Sustainability                                  | Worldwide         | NA                | NA                 | 45          | 2019         | Descriptive study                                        | correlation and regression analyses                                                    | carbon emissions              | 0.94                    | <0.05   | General         | Main Study                   | Secondary data | 101             | kWh/occupied room        | EUI              | R.S.A., T.M., and R.M.U.   | 27th October to 11th November, 2023 | Used in meta-analysis                                            |
| 3      | Rodrigo Schons Arenhart, Adriano Mendonça Souza, Roselaine Raviaro Zanini | 2022             | Sustainability                                  | Worldwide         | NA                | NA                 | 45          | 2019         | Descriptive study                                        | correlation and regression analyses                                                    | RevPAR                        | 0.84                    | <0.05   | General         | Main Study                   | Secondary data | 101             | kWh/occupied room        | EUI              | R.S.A., T.M., and R.M.U.   | 27th October to 11th November, 2023 | Used in meta-analysis                                            |
| 3      | Rodrigo Schons Arenhart, Adriano Mendonça Souza, Roselaine Raviaro Zanini | 2022             | Sustainability                                  | Worldwide         | NA                | NA                 | 45          | 2019         | Descriptive study                                        | correlation and regression analyses                                                    | Net return                    | 0.36                    | <0.05   | General         | Main Study                   | Secondary data | 101             | kWh/occupied room        | EUI              | R.S.A., T.M., and R.M.U.   | 27th October to 11th November, 2023 | Not used in meta-analysis due number of effect sizes less than 3 |
| 3      | Rodrigo Schons Arenhart, Adriano Mendonça Souza, Roselaine Raviaro Zanini | 2022             | Sustainability                                  | Worldwide         | NA                | NA                 | 45          | 2019         | Descriptive study                                        | correlation and regression analyses                                                    | water use                     | 0.54                    | <0.05   | General         | Main Study                   | Secondary data | 101             | kWh/occupied room        | EUI              | R.S.A., T.M., and R.M.U.   | 27th October to 11th November, 2023 | Used in meta-analysis                                            |
| 4      | Anh Tuan Nguyen, David Rockwood                                           | 2019             | Journal of Green Building                       | Danang, Vietnam   | 16.05             | 108.15             | 16          | 2015         | Descriptive study                                        | Descriptive Statistics, correlations, Simulation, and energy use indicator             | floor area                    | 0.90                    | <0.05   | 1.5             | Second use in the same study | Primary data   | 55820           | kWh/year                 | raw              | R.S.A., T.M., and R.M.U.   | 27th October to 11th November, 2023 | Not used in meta-analysis due sample number restriction          |
| 4      | Anh Tuan Nguyen, David Rockwood                                           | 2019             | Journal of Green Building                       | Danang, Vietnam   | 16.05             | 108.15             | 21          | 2015         | Descriptive study                                        | Descriptive Statistics, correlations, Simulation, and energy use indicator             | floor area                    | 0.80                    | <0.05   | 3               | Second use in the same study | Primary data   | 300999          | kWh/year                 | raw              | R.S.A., T.M., and R.M.U.   | 27th October to 11th November, 2023 | Used in meta-analysis                                            |
| 4      | Anh Tuan Nguyen, David Rockwood                                           | 2019             | Journal of Green Building                       | Danang, Vietnam   | 16.05             | 108.15             | 8           | 2015         | Descriptive study                                        | Descriptive Statistics, correlations, Simulation, and energy use indicator             | floor area                    | 0.71                    | <0.05   | 4               | Second use in the same study | Primary data   | 1325203         | kWh/year                 | raw              | R.S.A., T.M., and R.M.U.   | 27th October to 11th November, 2023 | Not used in meta-analysis due sample number restriction          |
| 4      | Anh Tuan Nguyen, David Rockwood                                           | 2019             | Journal of Green Building                       | Danang, Vietnam   | 16.05             | 108.15             | 5           | 2015         | Descriptive study                                        | Descriptive Statistics, correlations, Simulation, and energy use indicator             | floor area                    | 0.98                    | <0.05   | 5               | Second use in the same study | Primary data   | 12647491        | kWh/year                 | raw              | R.S.A., T.M., and R.M.U.   | 27th October to 11th November, 2023 | Not used in meta-analysis due sample number restriction          |
| 4      | Anh Tuan Nguyen, David Rockwood                                           | 2019             | Journal of Green Building                       | Danang, Vietnam   | 16.05             | 108.15             | 45          | 2015         | Descriptive study                                        | Descriptive Statistics, correlations, Simulation, and energy use indicator             | floor area                    | 0.88                    | <0.05   | General         | Main Study                   | Primary data   | 434460          | kWh/year                 | raw              | R.S.A., T.M., and R.M.U.   | 27th October to 11th November, 2023 | Used in meta-analysis                                            |
| 4      | Anh Tuan Nguyen, David Rockwood                                           | 2019             | Journal of Green Building                       | Danang, Vietnam   | 16.05             | 108.15             | 50          | 2015         | Descriptive study                                        | Descriptive Statistics, correlations, Simulation, and energy use indicator             | Occupancy rate                | 0.00                    | >0.05   | General         | Main Study                   | Primary data   | 87.4            | kWh/m <sup>2</sup> .year | EUI              | R.S.A., T.M., and R.M.U.   | 27th October to 11th November, 2023 | Used in meta-analysis                                            |
| 5      | Joseph H. K. Lai                                                          | 2016             | International Journal of Hospitality Management | Hong Kong         | 22.4              | 114.15             | 30          | 2013         | Descriptive study                                        | Descriptive statistics, benchmarking charts and Pearson correlations                   | Building age                  | 0.11                    | >0.10   | 4.5             | Main Study                   | Primary data   | 19976           | MWh/year                 | raw              | R.S.A., T.M., and R.M.U.   | 27th October to 11th November, 2023 | Used in meta-analysis                                            |
| 5      | Joseph H. K. Lai                                                          | 2016             | International Journal of Hospitality Management | Hong Kong         | 22.4              | 114.15             | 30          | 2013         | Descriptive study                                        | Descriptive statistics, benchmarking charts and Pearson correlations                   | floor area                    | 0.55                    | <0.01   | 4.5             | Main Study                   | Primary data   | 19976           | MWh/year                 | raw              | R.S.A., T.M., and R.M.U.   | 27th October to 11th November, 2023 | Used in meta-analysis                                            |
| 5      | Joseph H. K. Lai                                                          | 2016             | International Journal of Hospitality Management | Hong Kong         | 22.4              | 114.15             | 30          | 2013         | Descriptive study                                        | Descriptive statistics, benchmarking charts and Pearson correlations                   | Guestrooms                    | 0.16                    | >0.10   | 4.5             | Main Study                   | Primary data   | 19976           | MWh/year                 | raw              | R.S.A., T.M., and R.M.U.   | 27th October to 11th November, 2023 | Used in meta-analysis                                            |
| 5      | Joseph H. K. Lai                                                          | 2016             | International Journal of Hospitality Management | Hong Kong         | 22.4              | 114.15             | 30          | 2013         | Descriptive study                                        | Descriptive statistics, benchmarking charts and Pearson correlations                   | Occupancy rate                | -0.39                   | <0.05   | 4.5             | Main Study                   | Primary data   | 19976           | MWh/year                 | raw              | R.S.A., T.M., and R.M.U.   | 27th October to 11th November, 2023 | Used in meta-analysis                                            |
| 5      | Joseph H. K. Lai                                                          | 2016             | International Journal of Hospitality Management | Hong Kong         | 22.4              | 114.15             | 30          | 2013         | Descriptive study                                        | Descriptive statistics, benchmarking charts and Pearson correlations                   | floor area                    | -0.15                   | >0.10   | 4.5             | Second use in the same study | Primary data   | 474.55          | kWh/m <sup>2</sup>       | EUI              | R.S.A., T.M., and R.M.U.   | 27th October to 11th November, 2023 | Used in meta-analysis                                            |
| 5      | Joseph H. K. Lai                                                          | 2016             | International Journal of Hospitality Management | Hong Kong         | 22.4              | 114.15             | 30          | 2013         | Descriptive study                                        | Descriptive statistics, benchmarking charts and Pearson correlations                   | Guestrooms                    | -0.20                   | >0.10   | 4.5             | Second use in the same study | Primary data   | 474.55          | kWh/m <sup>2</sup>       | EUI              | R.S.A., T.M., and R.M.U.   | 27th October to 11th November, 2023 | Used in meta-analysis                                            |
| 5      | Joseph H. K. Lai                                                          | 2016             | International Journal of Hospitality Management | Hong Kong         | 22.4              | 114.15             | 30          | 2013         | Descriptive study                                        | Descriptive statistics, benchmarking charts and Pearson correlations                   | Occupancy rate                | -0.37                   | <0.05   | 4.5             | Second use in the same study | Primary data   | 474.55          | kWh/m <sup>2</sup>       | EUI              | R.S.A., T.M., and R.M.U.   | 27th October to 11th November, 2023 | Used in meta-analysis                                            |
| 6      | Wu Xuchao, Rajagopalan Priyadarisani, Lee Siew Eang                       | 2010             | Energy Policy                                   | Singapore         | 1.37              | 103.81             | 29          | 2004         | Descriptive study                                        | Descriptive statistics, regression techniques, consumption indicators and benchmarking | floor area                    | NA                      | NA      | General         | Data is from study 16        | Secondary data | 427             | kWh/m <sup>2</sup>       | EUI              | R.S.A., T.M., and R.M.U.   | 27th October to 11th November, 2023 | Not used in meta-analysis due duplicated data                    |
| 6      | Wu Xuchao, Rajagopalan Priyadarisani, Lee Siew Eang                       | 2010             | Energy Policy                                   | Singapore         | 1.37              | 103.81             | 29          | 2004         | Descriptive study                                        | Descriptive statistics, regression techniques, consumption indicators and benchmarking | number of floors              | NA                      | NA      | General         | Data is from study 16        | Secondary data | 427             | kWh/m <sup>2</sup>       | EUI              | R.S.A., T.M., and R.M.U.   | 27th October to 11th November, 2023 | Not used in meta-analysis due duplicated data                    |
| 6      | Wu Xuchao, Rajagopalan Priyadarisani, Lee Siew Eang                       | 2010             | Energy Policy                                   | Singapore         | 1.37              | 103.81             | 29          | 2004         | Descriptive study                                        | Descriptive statistics, regression techniques, consumption indicators and benchmarking | Guestrooms                    | NA                      | NA      | General         | Data is from study 16        | Secondary data | 427             | kWh/m <sup>2</sup>       | EUI              | R.S.A., T.M., and R.M.U.   | 27th October to 11th November, 2023 | Not used in meta-analysis due duplicated data                    |
| 6      | Wu Xuchao, Rajagopalan Priyadarisani, Lee Siew Eang                       | 2010             | Energy Policy                                   | Singapore         | 1.37              | 103.81             | 29          | 2004         | Descriptive study                                        | Descriptive statistics, regression techniques, consumption indicators and benchmarking | area of guestroom             | NA                      | NA      | General         | Data is from study 16        | Secondary data | 427             | kWh/m <sup>2</sup>       | EUI              | R.S.A., T.M., and R.M.U.   | 27th October to 11th November, 2023 | Not used in meta-analysis due duplicated data                    |



|    |                                                                                                            |      |                                                  |                                              |       |        |    |           |                                                                                       |                                                                                                    |                                    |       |       |         |                               |                |         |                         |     |                          |                                     |                                                                  |
|----|------------------------------------------------------------------------------------------------------------|------|--------------------------------------------------|----------------------------------------------|-------|--------|----|-----------|---------------------------------------------------------------------------------------|----------------------------------------------------------------------------------------------------|------------------------------------|-------|-------|---------|-------------------------------|----------------|---------|-------------------------|-----|--------------------------|-------------------------------------|------------------------------------------------------------------|
| 8  | Dania E. Santiago                                                                                          | 2021 | International Journal of Low-Carbon Technologies | Gran Canaria                                 | 28.01 | -15.59 | 6  | 2019-2020 | Descriptive study                                                                     | descriptive statistics, correlation analysis, linear regression                                    | ADR                                | 0.61  | <0.05 | General | Main Study                    | Primary data   | 200000  | kWh                     | raw | R.S.A., T.M., and R.M.U. | 27th October to 11th November, 2023 | Not used in meta-analysis due number of effect sizes less than 3 |
| 8  | Dania E. Santiago                                                                                          | 2021 | International Journal of Low-Carbon Technologies | Gran Canaria                                 | 28.01 | -15.59 | 6  | 2019-2020 | Descriptive study                                                                     | descriptive statistics, correlation analysis, linear regression                                    | guest per room                     | 0.54  | <0.05 | General | Main Study                    | Primary data   | 200000  | kWh                     | raw | R.S.A., T.M., and R.M.U. | 27th October to 11th November, 2023 | Not used in meta-analysis due number of effect sizes less than 3 |
| 8  | Dania E. Santiago                                                                                          | 2021 | International Journal of Low-Carbon Technologies | Gran Canaria                                 | 28.01 | -15.59 | 6  | 2019-2020 | Descriptive study                                                                     | descriptive statistics, correlation analysis, linear regression                                    | RevPAR                             | 0.64  | <0.05 | General | Main Study                    | Primary data   | 200000  | kWh                     | raw | R.S.A., T.M., and R.M.U. | 27th October to 11th November, 2023 | Used in meta-analysis                                            |
| 8  | Dania E. Santiago                                                                                          | 2021 | International Journal of Low-Carbon Technologies | Gran Canaria                                 | 28.01 | -15.59 | 6  | 2019-2020 | Descriptive study                                                                     | descriptive statistics, correlation analysis, linear regression                                    | GRI*                               | -0.15 | >0.05 | General | Main Study                    | Primary data   | 200000  | kWh                     | raw | R.S.A., T.M., and R.M.U. | 27th October to 11th November, 2023 | Not used in meta-analysis due number of effect sizes less than 3 |
| 8  | Dania E. Santiago                                                                                          | 2021 | International Journal of Low-Carbon Technologies | Gran Canaria                                 | 28.01 | -15.59 | 6  | 2019-2020 | Descriptive study                                                                     | descriptive statistics, correlation analysis, linear regression                                    | number of employees                | 0.79  | <0.05 | General | Main Study                    | Primary data   | 200000  | kWh                     | raw | R.S.A., T.M., and R.M.U. | 27th October to 11th November, 2023 | Used in meta-analysis                                            |
| 8  | Dania E. Santiago                                                                                          | 2021 | International Journal of Low-Carbon Technologies | Gran Canaria                                 | 28.01 | -15.59 | 6  | 2019-2020 | Descriptive study                                                                     | descriptive statistics, correlation analysis, linear regression                                    | guest-nights                       | 0.92  | <0.05 | General | Main Study                    | Primary data   | 200000  | kWh                     | raw | R.S.A., T.M., and R.M.U. | 27th October to 11th November, 2023 | Used in meta-analysis                                            |
| 8  | Dania E. Santiago                                                                                          | 2021 | International Journal of Low-Carbon Technologies | Gran Canaria                                 | 28.01 | -15.59 | 6  | 2019-2020 | Descriptive study                                                                     | descriptive statistics, correlation analysis, linear regression                                    | number of adult guests             | 0.91  | <0.05 | General | Main Study                    | Primary data   | 200000  | kWh                     | raw | R.S.A., T.M., and R.M.U. | 27th October to 11th November, 2023 | Not used in meta-analysis due number of effect sizes less than 3 |
| 8  | Dania E. Santiago                                                                                          | 2021 | International Journal of Low-Carbon Technologies | Gran Canaria                                 | 28.01 | -15.59 | 6  | 2019-2020 | Descriptive study                                                                     | descriptive statistics, correlation analysis, linear regression                                    | number of children guests          | 0.81  | <0.05 | General | Main Study                    | Primary data   | 200000  | kWh                     | raw | R.S.A., T.M., and R.M.U. | 27th October to 11th November, 2023 | Not used in meta-analysis due number of effect sizes less than 3 |
| 8  | Dania E. Santiago                                                                                          | 2021 | International Journal of Low-Carbon Technologies | Gran Canaria                                 | 28.01 | -15.59 | 6  | 2019-2020 | Descriptive study                                                                     | descriptive statistics, correlation analysis, linear regression                                    | number of diners                   | 0.95  | <0.05 | General | Main Study                    | Primary data   | 200000  | kWh                     | raw | R.S.A., T.M., and R.M.U. | 27th October to 11th November, 2023 | Not used in meta-analysis due number of effect sizes less than 3 |
| 8  | Dania E. Santiago                                                                                          | 2021 | International Journal of Low-Carbon Technologies | Gran Canaria                                 | 28.01 | -15.59 | 6  | 2019-2020 | Descriptive study                                                                     | descriptive statistics, correlation analysis, linear regression                                    | number of repairs                  | 0.87  | <0.05 | General | Main Study                    | Primary data   | 200000  | kWh                     | raw | R.S.A., T.M., and R.M.U. | 27th October to 11th November, 2023 | Not used in meta-analysis due number of effect sizes less than 3 |
| 8  | Dania E. Santiago                                                                                          | 2021 | International Journal of Low-Carbon Technologies | Gran Canaria                                 | 28.01 | -15.59 | 6  | 2019-2020 | Descriptive study                                                                     | descriptive statistics, correlation analysis, linear regression                                    | maintenance cost                   | 0.68  | <0.05 | General | Main Study                    | Primary data   | 200000  | kWh                     | raw | R.S.A., T.M., and R.M.U. | 27th October to 11th November, 2023 | Not used in meta-analysis due number of effect sizes less than 3 |
| 8  | Dania E. Santiago                                                                                          | 2021 | International Journal of Low-Carbon Technologies | Gran Canaria                                 | 28.01 | -15.59 | 6  | 2019-2020 | Descriptive study                                                                     | descriptive statistics, correlation analysis, linear regression                                    | water use                          | 0.94  | <0.05 | General | Main Study                    | Primary data   | 200000  | kWh                     | raw | R.S.A., T.M., and R.M.U. | 27th October to 11th November, 2023 | Used in meta-analysis                                            |
| 8  | Dania E. Santiago                                                                                          | 2021 | International Journal of Low-Carbon Technologies | Gran Canaria                                 | 28.01 | -15.59 | 6  | 2019-2020 | Descriptive study                                                                     | descriptive statistics, correlation analysis, linear regression                                    | refrigerants reposition            | 0.41  | <0.05 | General | Main Study                    | Primary data   | 200000  | kWh                     | raw | R.S.A., T.M., and R.M.U. | 27th October to 11th November, 2023 | Not used in meta-analysis due number of effect sizes less than 3 |
| 8  | Dania E. Santiago                                                                                          | 2021 | International Journal of Low-Carbon Technologies | Gran Canaria                                 | 28.01 | -15.59 | 6  | 2019-2020 | Descriptive study                                                                     | descriptive statistics, correlation analysis, linear regression                                    | recycled kitchen oil               | 0.84  | <0.05 | General | Main Study                    | Primary data   | 200000  | kWh                     | raw | R.S.A., T.M., and R.M.U. | 27th October to 11th November, 2023 | Not used in meta-analysis due number of effect sizes less than 3 |
| 8  | Dania E. Santiago                                                                                          | 2021 | International Journal of Low-Carbon Technologies | Gran Canaria                                 | 28.01 | -15.59 | 6  | 2019-2020 | Descriptive study                                                                     | descriptive statistics, correlation analysis, linear regression                                    | recycled cardboard                 | 0.81  | <0.05 | General | Main Study                    | Primary data   | 200000  | kWh                     | raw | R.S.A., T.M., and R.M.U. | 27th October to 11th November, 2023 | Not used in meta-analysis due number of effect sizes less than 3 |
| 8  | Dania E. Santiago                                                                                          | 2021 | International Journal of Low-Carbon Technologies | Gran Canaria                                 | 28.01 | -15.59 | 6  | 2019-2020 | Descriptive study                                                                     | descriptive statistics, correlation analysis, linear regression                                    | Occupancy rate                     | 0.39  | <0.05 | General | Main Study                    | Primary data   | 200000  | kWh                     | raw | R.S.A., T.M., and R.M.U. | 27th October to 11th November, 2023 | Used in meta-analysis                                            |
| 9  | Wilco W. Chan, Barry L. Mak                                                                                | 2004 | Journal of Sustainable Tourism                   | Hong Kong                                    | 22.4  | 114.15 | 10 | 1994-1996 | Descriptive study (Considering only the Oil Diesel for energy use in water and steam) | Linear Regression                                                                                  | floor area                         | 0.95  | <0.05 | General | Third use data from study 24  | Secondary data | 35000   | MJ                      | raw | R.S.A., T.M., and R.M.U. | 27th October to 11th November, 2023 | Used in meta-analysis                                            |
| 10 | Wilco W. Chan, Joseph C. Lam                                                                               | 2002 | Hospitality Management                           | Hong Kong                                    | 22.4  | 114.15 | 17 | 1994-1996 | descriptive study (considering only the electricity source for energy use)            | Linear Regression                                                                                  | floor area                         | 0.94  | <0.05 | General | second use data from study 24 | Secondary data | 10000   | MWh                     | raw | R.S.A., T.M., and R.M.U. | 27th October to 11th November, 2023 | Used in meta-analysis                                            |
| 10 | Wilco W. Chan, Joseph C. Lam                                                                               | 2002 | Hospitality Management                           | Hong Kong                                    | 22.4  | 114.15 | 17 | 1994-1996 | descriptive study (considering only the electricity source for energy use)            | Linear Regression                                                                                  | floor area                         | -0.37 | NI    | General | second use data from study 24 | Secondary data | 342.02  | kWh/m <sup>2</sup>      | EUI | R.S.A., T.M., and R.M.U. | 27th October to 11th November, 2023 | Used in meta-analysis                                            |
| 10 | Wilco W. Chan, Joseph C. Lam                                                                               | 2002 | Hospitality Management                           | Hong Kong                                    | 22.4  | 114.15 | 17 | 1994-1996 | descriptive study (considering only the electricity source for energy use)            | Linear Regression                                                                                  | occupied rooms                     | 0.78  | >0.05 | General | second use data from study 24 | Secondary data | 10000   | MWh                     | raw | R.S.A., T.M., and R.M.U. | 27th October to 11th November, 2023 | Used in meta-analysis                                            |
| 11 | Suwajee Tangon, Jaruwat Chontanawat, Siriluk Chiarakorn                                                    | 2018 | Asia-Pacific Journal of Science and Technology   | Thailand                                     | 13.7  | 100.6  | 63 | 2011      | Descriptive study                                                                     | Linear Regression and consumption indicators                                                       | Occupancy rate                     | -0.25 | <0.05 | General | Second use in the same study  | Primary data   | 2292.36 | kWh/room night          | EUI | R.S.A., T.M., and R.M.U. | 27th October to 11th November, 2023 | Used in meta-analysis                                            |
| 11 | Suwajee Tangon, Jaruwat Chontanawat, Siriluk Chiarakorn                                                    | 2018 | Asia-Pacific Journal of Science and Technology   | Thailand                                     | 13.7  | 100.6  | 63 | 2011      | Descriptive study                                                                     | Linear Regression and consumption indicators                                                       | Guestrooms                         | 0.74  | <0.01 | General | Main Study                    | Primary data   | 800000  | KWh/month               | raw | R.S.A., T.M., and R.M.U. | 27th October to 11th November, 2023 | Used in meta-analysis                                            |
| 11 | Suwajee Tangon, Jaruwat Chontanawat, Siriluk Chiarakorn                                                    | 2018 | Asia-Pacific Journal of Science and Technology   | Thailand                                     | 13.7  | 100.6  | 63 | 2011      | Descriptive study                                                                     | Linear Regression and consumption indicators                                                       | floor area                         | 0.82  | <0.01 | General | Main Study                    | Primary data   | 800000  | KWh/month               | raw | R.S.A., T.M., and R.M.U. | 27th October to 11th November, 2023 | Used in meta-analysis                                            |
| 11 | Suwajee Tangon, Jaruwat Chontanawat, Siriluk Chiarakorn                                                    | 2018 | Asia-Pacific Journal of Science and Technology   | Thailand                                     | 13.7  | 100.6  | 63 | 2011      | Descriptive study                                                                     | Linear Regression and consumption indicators                                                       | number of floors                   | 0.52  | <0.01 | General | Main Study                    | Primary data   | 800000  | KWh/month               | raw | R.S.A., T.M., and R.M.U. | 27th October to 11th November, 2023 | Used in meta-analysis                                            |
| 11 | Suwajee Tangon, Jaruwat Chontanawat, Siriluk Chiarakorn                                                    | 2018 | Asia-Pacific Journal of Science and Technology   | Thailand                                     | 13.7  | 100.6  | 63 | 2011      | Descriptive study                                                                     | Linear Regression and consumption indicators                                                       | Bangkok                            | 0.27  | <0.05 | General | Main Study                    | Primary data   | 800000  | KWh/month               | raw | R.S.A., T.M., and R.M.U. | 27th October to 11th November, 2023 | Not used in meta-analysis due number of effect sizes less than 3 |
| 11 | Suwajee Tangon, Jaruwat Chontanawat, Siriluk Chiarakorn                                                    | 2018 | Asia-Pacific Journal of Science and Technology   | Thailand                                     | 13.7  | 100.6  | 63 | 2011      | Descriptive study                                                                     | Linear Regression and consumption indicators                                                       | number of employees                | 0.80  | <0.01 | General | Main Study                    | Primary data   | 800000  | KWh/month               | raw | R.S.A., T.M., and R.M.U. | 27th October to 11th November, 2023 | Used in meta-analysis                                            |
| 11 | Suwajee Tangon, Jaruwat Chontanawat, Siriluk Chiarakorn                                                    | 2018 | Asia-Pacific Journal of Science and Technology   | Thailand                                     | 13.7  | 100.6  | 63 | 2011      | Descriptive study                                                                     | Linear Regression and consumption indicators                                                       | guest-nights                       | 0.77  | <0.01 | General | Main Study                    | Primary data   | 800000  | KWh/month               | raw | R.S.A., T.M., and R.M.U. | 27th October to 11th November, 2023 | Used in meta-analysis                                            |
| 11 | Suwajee Tangon, Jaruwat Chontanawat, Siriluk Chiarakorn                                                    | 2018 | Asia-Pacific Journal of Science and Technology   | Thailand                                     | 13.7  | 100.6  | 63 | 2011      | Descriptive study                                                                     | Linear Regression and consumption indicators                                                       | number of guests                   | 0.77  | <0.01 | General | Main Study                    | Primary data   | 800000  | KWh/month               | raw | R.S.A., T.M., and R.M.U. | 27th October to 11th November, 2023 | Used in meta-analysis                                            |
| 11 | Suwajee Tangon, Jaruwat Chontanawat, Siriluk Chiarakorn                                                    | 2018 | Asia-Pacific Journal of Science and Technology   | Thailand                                     | 13.7  | 100.6  | 63 | 2011      | Descriptive study                                                                     | Linear Regression and consumption indicators                                                       | worker density                     | 0.62  | <0.01 | General | Second use in the same study  | Primary data   | 321.84  | kWh/m <sup>2</sup> year | EUI | R.S.A., T.M., and R.M.U. | 27th October to 11th November, 2023 | Used in meta-analysis                                            |
| 12 | Francisco Javier Diaz Perez, David Chinarro, Adib Guardiola Moshaffel, Ricardo Diaz Martin, Rosa Pito Otin | 2016 | Italian Journal of Science and Technology        | Fuerteventura and Lanzarote (Canary Islands) | 28.78 | -13.78 | 6  | 2007-2015 | Descriptive study                                                                     | Regression analysis                                                                                | Occupancy rate                     | -0.95 | NI    | 4       | Main Study                    | Primary data   | 16      | KWh/customer.day        | EUI | R.S.A., T.M., and R.M.U. | 27th October to 11th November, 2023 | Used in meta-analysis                                            |
| 13 | Yajuan Xin, Shilei Lu, Neng Zhu, Wei Wu                                                                    | 2012 | Energy and Buildings                             | Hainan Province, China                       | 19.22 | 109.8  | 19 | 2009      | Energy Consumption Quota                                                              | Descriptive statistics, consumption indicators and Pearson Correlations                            | Occupancy rate                     | 0.03  | >0.10 | 4.5     | Main Study                    | Primary data   | 6850000 | KWh                     | raw | R.S.A., T.M., and R.M.U. | 27th October to 11th November, 2023 | Used in meta-analysis                                            |
| 13 | Yajuan Xin, Shilei Lu, Neng Zhu, Wei Wu                                                                    | 2012 | Energy and Buildings                             | Hainan Province, China                       | 19.22 | 109.8  | 19 | 2009      | Energy Consumption Quota                                                              | Descriptive statistics, consumption indicators and Pearson Correlations                            | Building area                      | 0.88  | <0.01 | 4.5     | Main Study                    | Primary data   | 6850000 | KWh                     | raw | R.S.A., T.M., and R.M.U. | 27th October to 11th November, 2023 | Not used in meta-analysis due number of effect sizes less than 3 |
| 13 | Yajuan Xin, Shilei Lu, Neng Zhu, Wei Wu                                                                    | 2012 | Energy and Buildings                             | Hainan Province, China                       | 19.22 | 109.8  | 19 | 2009      | Energy Consumption Quota                                                              | Descriptive statistics, consumption indicators and Pearson Correlations                            | Building age                       | -0.10 | >0.10 | 4.5     | Main Study                    | Primary data   | 6850000 | KWh                     | raw | R.S.A., T.M., and R.M.U. | 27th October to 11th November, 2023 | Used in meta-analysis                                            |
| 13 | Yajuan Xin, Shilei Lu, Neng Zhu, Wei Wu                                                                    | 2012 | Energy and Buildings                             | Hainan Province, China                       | 19.22 | 109.8  | 19 | 2009      | Energy Consumption Quota                                                              | Descriptive statistics, consumption indicators and Pearson Correlations                            | Guestrooms                         | 0.69  | <0.01 | 4.5     | Main Study                    | Primary data   | 6850000 | KWh                     | raw | R.S.A., T.M., and R.M.U. | 27th October to 11th November, 2023 | Used in meta-analysis                                            |
| 13 | Yajuan Xin, Shilei Lu, Neng Zhu, Wei Wu                                                                    | 2012 | Energy and Buildings                             | Hainan Province, China                       | 19.22 | 109.8  | 19 | 2009      | Energy Consumption Quota                                                              | Descriptive statistics, consumption indicators and Pearson Correlations                            | Equivalent rooms (rooms*occupancy) | 0.66  | <0.01 | 4.5     | Main Study                    | Primary data   | 6850000 | KWh                     | raw | R.S.A., T.M., and R.M.U. | 27th October to 11th November, 2023 | Not used in meta-analysis due number of effect sizes less than 3 |
| 13 | Yajuan Xin, Shilei Lu, Neng Zhu, Wei Wu                                                                    | 2012 | Energy and Buildings                             | Hainan Province, China                       | 19.22 | 109.8  | 19 | 2009      | Energy Consumption Quota                                                              | Descriptive statistics, consumption indicators and Pearson Correlations                            | Guestrooms                         | 0.07  | >0.10 | 4.5     | Second use in the same study  | Primary data   | 70      | KWh/m <sup>2</sup>      | EUI | R.S.A., T.M., and R.M.U. | 27th October to 11th November, 2023 | Used in meta-analysis                                            |
| 13 | Yajuan Xin, Shilei Lu, Neng Zhu, Wei Wu                                                                    | 2012 | Energy and Buildings                             | Hainan Province, China                       | 19.22 | 109.8  | 19 | 2009      | Energy Consumption Quota                                                              | Descriptive statistics, consumption indicators and Pearson Correlations                            | Occupancy rate                     | 0.36  | >0.10 | 4.5     | Second use in the same study  | Primary data   | 70      | KWh/m <sup>2</sup>      | EUI | R.S.A., T.M., and R.M.U. | 27th October to 11th November, 2023 | Used in meta-analysis                                            |
| 14 | Mingfang Tang, Xiao Fu, Huiming Cao, Yuan Shen, Hongbing Deng, Gang Wu                                     | 2016 | Sustainability                                   | Lijiang, China                               | 26.87 | 100.24 | 24 | 2012      | Descriptive study                                                                     | Descriptive statistics and Pearson Correlations and Regression Analysis and consumption indicators | floor area                         | 0.44  | <0.05 | General | Main Study                    | Primary data   | 110     | kWh/m <sup>2</sup>      | EUI | R.S.A., T.M., and R.M.U. | 27th October to 11th November, 2023 | Used in meta-analysis                                            |
| 14 | Mingfang Tang, Xiao Fu, Huiming Cao, Yuan Shen, Hongbing Deng, Gang Wu                                     | 2016 | Sustainability                                   | Lijiang, China                               | 26.87 | 100.24 | 24 | 2012      | Descriptive study                                                                     | Descriptive statistics and Pearson Correlations and Regression Analysis and consumption indicators | Guestrooms                         | 0.60  | <0.01 | General | Main Study                    | Primary data   | 110     | kWh/m <sup>2</sup>      | EUI | R.S.A., T.M., and R.M.U. | 27th October to 11th November, 2023 | Used in meta-analysis                                            |



|    |                                                        |      |                                  |                          |       |        |     |           |                                                                     |                                                                                           |                               |       |       |         |                              |                |          |                  |     |                          |                                     |                                                                                                                   |
|----|--------------------------------------------------------|------|----------------------------------|--------------------------|-------|--------|-----|-----------|---------------------------------------------------------------------|-------------------------------------------------------------------------------------------|-------------------------------|-------|-------|---------|------------------------------|----------------|----------|------------------|-----|--------------------------|-------------------------------------|-------------------------------------------------------------------------------------------------------------------|
| 15 | Rajagopalan Priyadarisni, Wu Xuachao, Lee Siew Eang    | 2009 | Energy and Buildings             | Singapore                | 1.37  | 103.81 | 29  | 2004      | Descriptive study                                                   | Descriptive statistics, regression techniques, consumption indicators and benchmarking    | occupied rooms                | 0.76  | NI    | General | Main Study                   | Primary data   | 9000     | MWh/year         | raw | R.S.A., T.M., and R.M.U. | 27th October to 11th November, 2023 | Used in meta-analysis                                                                                             |
| 16 | Paulina Bohdanowicz, Ivo Martinac                      | 2007 | Energy and Buildings             | Europe                   | 54.3  | 15.04  | 73  | 2004      | Descriptive study                                                   | Descriptive statistics, consumption indicators, multiple regression, benchmarking         | floor area                    | 0.84  | NI    | Upscale | Main Study                   | Secondary data | 11000    | MWh/year         | raw | R.S.A., T.M., and R.M.U. | 27th October to 11th November, 2023 | Used in meta-analysis                                                                                             |
| 16 | Paulina Bohdanowicz, Ivo Martinac                      | 2007 | Energy and Buildings             | Europe                   | 54.3  | 15.04  | 111 | 2004      | Descriptive study                                                   | Descriptive statistics, consumption indicators, multiple regression, benchmarking         | floor area                    | 0.87  | NI    | General | Main Study                   | Secondary data | 6000     | MWh/year         | raw | R.S.A., T.M., and R.M.U. | 27th October to 11th November, 2023 | Used in meta-analysis                                                                                             |
| 16 | Paulina Bohdanowicz, Ivo Martinac                      | 2007 | Energy and Buildings             | Europe                   | 54.3  | 15.04  | 73  | 2004      | Descriptive study                                                   | Descriptive statistics, consumption indicators, multiple regression, benchmarking         | guest-nights                  | 0.62  | NI    | Upscale | Main Study                   | Secondary data | 11000    | MWh/year         | raw | R.S.A., T.M., and R.M.U. | 27th October to 11th November, 2023 | Used in meta-analysis                                                                                             |
| 16 | Paulina Bohdanowicz, Ivo Martinac                      | 2007 | Energy and Buildings             | Europe                   | 54.3  | 15.04  | 111 | 2004      | Descriptive study                                                   | Descriptive statistics, consumption indicators, multiple regression, benchmarking         | guest-nights                  | 0.82  | NI    | General | Main Study                   | Secondary data | 6000     | MWh/year         | raw | R.S.A., T.M., and R.M.U. | 27th October to 11th November, 2023 | Used in meta-analysis                                                                                             |
| 16 | Paulina Bohdanowicz, Ivo Martinac                      | 2007 | Energy and Buildings             | Europe                   | 54.3  | 15.04  | 73  | 2004      | Descriptive study                                                   | Descriptive statistics, consumption indicators, multiple regression, benchmarking         | food covers                   | 0.71  | NI    | Upscale | Main Study                   | Secondary data | 11000    | MWh/year         | raw | R.S.A., T.M., and R.M.U. | 27th October to 11th November, 2023 | Used in meta-analysis                                                                                             |
| 16 | Paulina Bohdanowicz, Ivo Martinac                      | 2007 | Energy and Buildings             | Europe                   | 54.3  | 15.04  | 111 | 2004      | Descriptive study                                                   | Descriptive statistics, consumption indicators, multiple regression, benchmarking         | food covers                   | 0.81  | NI    | General | Main Study                   | Secondary data | 6000     | MWh/year         | raw | R.S.A., T.M., and R.M.U. | 27th October to 11th November, 2023 | Used in meta-analysis                                                                                             |
| 16 | Paulina Bohdanowicz, Ivo Martinac                      | 2007 | Energy and Buildings             | Europe                   | 54.3  | 15.04  | 73  | 2004      | Descriptive study                                                   | Descriptive statistics, consumption indicators, multiple regression, benchmarking         | Construction Year             | 0.14  | NI    | Upscale | Main Study                   | Secondary data | 364.3    | kWh/m²           | EUI | R.S.A., T.M., and R.M.U. | 27th October to 11th November, 2023 | Used in meta-analysis                                                                                             |
| 16 | Paulina Bohdanowicz, Ivo Martinac                      | 2007 | Energy and Buildings             | Europe                   | 54.3  | 15.04  | 111 | 2004      | Descriptive study                                                   | Descriptive statistics, consumption indicators, multiple regression, benchmarking         | Construction Year             | 0.07  | NI    | General | Main Study                   | Secondary data | 285      | kWh/m²           | EUI | R.S.A., T.M., and R.M.U. | 27th October to 11th November, 2023 | Used in meta-analysis                                                                                             |
| 16 | Paulina Bohdanowicz, Ivo Martinac                      | 2007 | Energy and Buildings             | Europe                   | 54.3  | 15.04  | 73  | 2004      | Descriptive study                                                   | Descriptive statistics, consumption indicators, multiple regression, benchmarking         | floor area                    | 0.30  | NI    | Upscale | Second use in the same study | Secondary data | 364.3    | kWh/m²           | EUI | R.S.A., T.M., and R.M.U. | 27th October to 11th November, 2023 | Used in meta-analysis                                                                                             |
| 16 | Paulina Bohdanowicz, Ivo Martinac                      | 2007 | Energy and Buildings             | Europe                   | 54.3  | 15.04  | 111 | 2004      | Descriptive study                                                   | Descriptive statistics, consumption indicators, multiple regression, benchmarking         | floor area                    | 0.17  | NI    | General | Second use in the same study | Secondary data | 285      | kWh/m²           | EUI | R.S.A., T.M., and R.M.U. | 27th October to 11th November, 2023 | Used in meta-analysis                                                                                             |
| 17 | Jen Chun Wang, Kuo-Tsang Huang                         | 2013 | Energy                           | Taiwan                   | 23.95 | 121    | 34  | 2010      | Descriptive study                                                   | Descriptive statistics, correlation analysis, consumption indicators, multiple regression | worker density                | 0.42  | <0.05 | 4.5     | Main Study                   | Primary data   | 25200000 | MJ/Year          | raw | R.S.A., T.M., and R.M.U. | 27th October to 11th November, 2023 | Used in meta-analysis                                                                                             |
| 17 | Jen Chun Wang, Kuo-Tsang Huang                         | 2013 | Energy                           | Taiwan                   | 23.95 | 121    | 34  | 2010      | Descriptive study                                                   | Descriptive statistics, correlation analysis, consumption indicators, multiple regression | cooling temperature           | -0.77 | <0.01 | 4.5     | Main Study                   | Primary data   | 25200000 | MJ/Year          | raw | R.S.A., T.M., and R.M.U. | 27th October to 11th November, 2023 | Not used in meta-analysis due number of effect sizes less than 3                                                  |
| 17 | Jen Chun Wang, Kuo-Tsang Huang                         | 2013 | Energy                           | Taiwan                   | 23.95 | 121    | 34  | 2010      | Descriptive study                                                   | Descriptive statistics, correlation analysis, consumption indicators, multiple regression | Additional services area      | 0.92  | NI    | 4.5     | Main Study                   | Primary data   | 207      | MJ/guestnight    | EUI | R.S.A., T.M., and R.M.U. | 27th October to 11th November, 2023 | Not used in meta-analysis due number of effect sizes less than 3                                                  |
| 17 | Jen Chun Wang, Kuo-Tsang Huang                         | 2013 | Energy                           | Taiwan                   | 23.95 | 121    | 73  | 2010      | Descriptive study                                                   | Descriptive statistics, correlation analysis, consumption indicators, multiple regression | number of guests              | 0.90  | <0.05 | 4.5     | Main Study                   | Primary data   | 25200000 | MJ/Year          | raw | R.S.A., T.M., and R.M.U. | 27th October to 11th November, 2023 | Used in meta-analysis                                                                                             |
| 17 | Jen Chun Wang, Kuo-Tsang Huang                         | 2013 | Energy                           | Taiwan                   | 23.95 | 121    | 73  | 2010      | Descriptive study                                                   | Descriptive statistics, correlation analysis, consumption indicators, multiple regression | Group of guests               | 0.84  | <0.05 | 4.5     | Main Study                   | Primary data   | 25200000 | MJ/Year          | raw | R.S.A., T.M., and R.M.U. | 27th October to 11th November, 2023 | Not used in meta-analysis due number of effect sizes less than 3                                                  |
| 18 | Maja Štimac, Mario Matkovic, Daria KaraslihoVIC Sedlar | 2023 | Sustainability                   | Croatia - Adriatic Coast | 45.31 | 14.86  | 51  | 2016-2021 | Descriptive study using only the gas consumption                    | Descriptive statistics, correlation analysis, regression analysis                         | floor area                    | 0.85  | NI    | General | Main Study                   | Primary data   | 800000   | kWh/year         | raw | R.S.A., T.M., and R.M.U. | 27th October to 11th November, 2023 | Used in meta-analysis                                                                                             |
| 18 | Maja Štimac, Mario Matkovic, Daria KaraslihoVIC Sedlar | 2023 | Sustainability                   | Croatia - Adriatic Coast | 45.31 | 14.86  | 51  | 2016-2021 | Descriptive study using only the gas consumption                    | Descriptive statistics, correlation analysis, regression analysis                         | Guestrooms                    | 0.67  | NI    | General | Main Study                   | Primary data   | 800000   | kWh/year         | raw | R.S.A., T.M., and R.M.U. | 27th October to 11th November, 2023 | Used in meta-analysis                                                                                             |
| 18 | Maja Štimac, Mario Matkovic, Daria KaraslihoVIC Sedlar | 2023 | Sustainability                   | Croatia - Adriatic Coast | 45.31 | 14.86  | 51  | 2016-2021 | Descriptive study using only the gas consumption                    | Descriptive statistics, correlation analysis, regression analysis                         | floor area                    | 0.58  | NI    | General | Second use in the same study | Primary data   | 40       | kWh/m²           | EUI | R.S.A., T.M., and R.M.U. | 27th October to 11th November, 2023 | Used in meta-analysis                                                                                             |
| 19 | Silu Bhochhibhoya                                      | 2016 | Università degli Studi di Padova | Solkhumbu, Nepal         | 27.74 | 86.73  | 45  | 2014      | Life Cycle Assessment (LCA) and Life Cycle Costing (LCC)            | Descriptive statistics, ANOVA, correlation analysis                                       | Carbon emissions construction | -0.03 | >0.05 | General | Main Study                   | Primary data   | 10.74    | kWh/Person.Night | EUI | R.S.A., T.M., and R.M.U. | 27th October to 11th November, 2023 | Not used in meta-analysis due number of effect sizes less than 3                                                  |
| 19 | Silu Bhochhibhoya                                      | 2016 | Università degli Studi di Padova | Solkhumbu, Nepal         | 27.74 | 86.73  | 45  | 2014      | Life Cycle Assessment (LCA) and Life Cycle Costing (LCC)            | Descriptive statistics, ANOVA, correlation analysis                                       | Carbon emission operation     | 0.89  | <0.05 | General | Main Study                   | Primary data   | 10.74    | kWh/Person.Night | EUI | R.S.A., T.M., and R.M.U. | 27th October to 11th November, 2023 | Not used in meta-analysis due number of effect sizes less than 3                                                  |
| 19 | Silu Bhochhibhoya                                      | 2016 | Università degli Studi di Padova | Solkhumbu, Nepal         | 27.74 | 86.73  | 45  | 2014      | Life Cycle Assessment (LCA) and Life Cycle Costing (LCC)            | Descriptive statistics, ANOVA, correlation analysis                                       | Carbon emissions replacement  | 0.39  | <0.05 | General | Main Study                   | Primary data   | 10.74    | kWh/Person.Night | EUI | R.S.A., T.M., and R.M.U. | 27th October to 11th November, 2023 | Not used in meta-analysis due number of effect sizes less than 3                                                  |
| 19 | Silu Bhochhibhoya                                      | 2016 | Università degli Studi di Padova | Solkhumbu, Nepal         | 27.74 | 86.73  | 45  | 2014      | Life Cycle Assessment (LCA) and Life Cycle Costing (LCC)            | Descriptive statistics, ANOVA, correlation analysis                                       | carbon emissions              | 0.89  | <0.05 | General | Main Study                   | Primary data   | 10.74    | kWh/Person.Night | EUI | R.S.A., T.M., and R.M.U. | 27th October to 11th November, 2023 | Used in meta-analysis                                                                                             |
| 19 | Silu Bhochhibhoya                                      | 2016 | Università degli Studi di Padova | Solkhumbu, Nepal         | 27.74 | 86.73  | 45  | 2014      | Life Cycle Assessment (LCA) and Life Cycle Costing (LCC)            | Descriptive statistics, ANOVA, correlation analysis                                       | Construction cost             | 0.31  | <0.05 | General | Main Study                   | Primary data   | 10.74    | kWh/Person.Night | EUI | R.S.A., T.M., and R.M.U. | 27th October to 11th November, 2023 | Not used in meta-analysis due number of effect sizes less than 3                                                  |
| 19 | Silu Bhochhibhoya                                      | 2016 | Università degli Studi di Padova | Solkhumbu, Nepal         | 27.74 | 86.73  | 45  | 2014      | Life Cycle Assessment (LCA) and Life Cycle Costing (LCC)            | Descriptive statistics, ANOVA, correlation analysis                                       | Operation cost                | 0.41  | <0.05 | General | Main Study                   | Primary data   | 10.74    | kWh/Person.Night | EUI | R.S.A., T.M., and R.M.U. | 27th October to 11th November, 2023 | Not used in meta-analysis due number of effect sizes less than 3                                                  |
| 19 | Silu Bhochhibhoya                                      | 2016 | Università degli Studi di Padova | Solkhumbu, Nepal         | 27.74 | 86.73  | 45  | 2014      | Life Cycle Assessment (LCA) and Life Cycle Costing (LCC)            | Descriptive statistics, ANOVA, correlation analysis                                       | Maintenance cost replacement  | 0.27  | >0.05 | General | Main Study                   | Primary data   | 10.74    | kWh/Person.Night | EUI | R.S.A., T.M., and R.M.U. | 27th October to 11th November, 2023 | Not used in meta-analysis due number of effect sizes less than 3                                                  |
| 19 | Silu Bhochhibhoya                                      | 2016 | Università degli Studi di Padova | Solkhumbu, Nepal         | 27.74 | 86.73  | 45  | 2014      | Life Cycle Assessment (LCA) and Life Cycle Costing (LCC)            | Descriptive statistics, ANOVA, correlation analysis                                       | custo total                   | 0.43  | <0.05 | General | Main Study                   | Primary data   | 10.74    | kWh/Person.Night | EUI | R.S.A., T.M., and R.M.U. | 27th October to 11th November, 2023 | Not used in meta-analysis due number of effect sizes less than 3                                                  |
| 19 | Silu Bhochhibhoya                                      | 2016 | Università degli Studi di Padova | Solkhumbu, Nepal         | 27.74 | 86.73  | 45  | 2014      | Life Cycle Assessment (LCA) and Life Cycle Costing (LCC)            | Descriptive statistics, ANOVA, correlation analysis                                       | Loss rate                     | -0.02 | >0.05 | General | Main Study                   | Primary data   | 10.74    | kWh/Person.Night | EUI | R.S.A., T.M., and R.M.U. | 27th October to 11th November, 2023 | Not used in meta-analysis due number of effect sizes less than 3                                                  |
| 19 | Silu Bhochhibhoya                                      | 2016 | Università degli Studi di Padova | Solkhumbu, Nepal         | 27.74 | 86.73  | 45  | 2014      | Life Cycle Assessment (LCA) and Life Cycle Costing (LCC)            | Descriptive statistics, ANOVA, correlation analysis                                       | number of guests              | -0.48 | <0.05 | General | Main Study                   | Primary data   | 10.74    | kWh/Person.Night | EUI | R.S.A., T.M., and R.M.U. | 27th October to 11th November, 2023 | Used in meta-analysis                                                                                             |
| 19 | Silu Bhochhibhoya                                      | 2016 | Università degli Studi di Padova | Solkhumbu, Nepal         | 27.74 | 86.73  | 45  | 2014      | Life Cycle Assessment (LCA) and Life Cycle Costing (LCC)            | Descriptive statistics, ANOVA, correlation analysis                                       | Building area                 | -0.33 | <0.05 | General | Main Study                   | Primary data   | 10.74    | kWh/Person.Night | EUI | R.S.A., T.M., and R.M.U. | 27th October to 11th November, 2023 | Not used in meta-analysis due number of effect sizes less than 3                                                  |
| 20 | Houcem Eddine Mechri, Samir Amara                      | 2021 | Energy and Buildings             | Tunisia                  | 35.94 | 9.83   | 130 | NI        | Descriptive study                                                   | Descriptive statistics, correlation analysis, energy use indicators                       | Occupancy rate                | 0.00  | NI    | General | Main Study                   | Primary data   | 897      | toe/year         | raw | R.S.A., T.M., and R.M.U. | 27th October to 11th November, 2023 | Used in meta-analysis                                                                                             |
| 20 | Houcem Eddine Mechri, Samir Amara                      | 2021 | Energy and Buildings             | Tunisia                  | 35.94 | 9.83   | 55  | NI        | Descriptive study (coleta de dados sobre floor area teve problemas) | Descriptive statistics, correlation analysis, energy use indicators                       | floor area                    | NA    | NI    | General | Main Study                   | Primary data   | 897      | toe/year         | raw | R.S.A., T.M., and R.M.U. | 27th October to 11th November, 2023 | Not used in meta-analysis due problems in data collection (variable floor area together/mixed with building area) |
| 20 | Houcem Eddine Mechri, Samir Amara                      | 2021 | Energy and Buildings             | Tunisia                  | 35.94 | 9.83   | 55  | NI        | Descriptive study                                                   | Descriptive statistics, correlation analysis, energy use indicators                       | area of guestroom             | 0.56  | NI    | General | Main Study                   | Primary data   | 897      | toe/year         | raw | R.S.A., T.M., and R.M.U. | 27th October to 11th November, 2023 | Used in meta-analysis                                                                                             |
| 20 | Houcem Eddine Mechri, Samir Amara                      | 2021 | Energy and Buildings             | Tunisia                  | 35.94 | 9.83   | 111 | NI        | Descriptive study                                                   | Descriptive statistics, correlation analysis, energy use indicators                       | Guestrooms                    | 0.45  | NI    | General | Main Study                   | Primary data   | 897      | toe/year         | raw | R.S.A., T.M., and R.M.U. | 27th October to 11th November, 2023 | Used in meta-analysis                                                                                             |
| 20 | Houcem Eddine Mechri, Samir Amara                      | 2021 | Energy and Buildings             | Tunisia                  | 35.94 | 9.83   | 103 | NI        | Descriptive study                                                   | Descriptive statistics, correlation analysis, energy use indicators                       | Number of beds                | 0.41  | NI    | General | Main Study                   | Primary data   | 897      | toe/year         | raw | R.S.A., T.M., and R.M.U. | 27th October to 11th November, 2023 | Not used in meta-analysis due number of effect sizes less than 3                                                  |
| 20 | Houcem Eddine Mechri, Samir Amara                      | 2021 | Energy and Buildings             | Tunisia                  | 35.94 | 9.83   | 133 | NI        | Descriptive study                                                   | Descriptive statistics, correlation analysis, energy use indicators                       | guest-nights                  | 0.35  | NI    | General | Main Study                   | Primary data   | 897      | toe/year         | raw | R.S.A., T.M., and R.M.U. | 27th October to 11th November, 2023 | Used in meta-analysis                                                                                             |
| 20 | Houcem Eddine Mechri, Samir Amara                      | 2021 | Energy and Buildings             | Tunisia                  | 35.94 | 9.83   | 85  | NI        | Descriptive study                                                   | Descriptive statistics, correlation analysis, energy use indicators                       | food covers                   | 0.28  | NI    | General | Main Study                   | Primary data   | 897      | toe/year         | raw | R.S.A., T.M., and R.M.U. | 27th October to 11th November, 2023 | Used in meta-analysis                                                                                             |
| 21 | Jen Chun Wang                                          | 2012 | Energy and Buildings             | Taiwan                   | 23.95 | 121    | 200 | 2010      | Descriptive study                                                   | Descriptive statistics, correlation analysis, energy use indicators, regression analysis  | ambient temperature           | 0.88  | NI    | General | Main Study                   | Primary data   | 7000     | MWh/year         | raw | R.S.A., T.M., and R.M.U. | 27th October to 11th November, 2023 | Used in meta-analysis                                                                                             |
