# Supplementary material for: Energy use and its contributors in hotel buildings: A systematic review and meta-analysis
Source: PubMed Central journal article supplement (PMC11500959; doi:10.1371/journal.pone.0309745), 2024-10-24
Supplement: pone.0309745.s003.pdf [file pone.0309745.s003.pdf]

S3 Table. Independent variables retrieved from the included studies

| Dimension                | Variable                          | Effect sizes |
|--------------------------|-----------------------------------|--------------|
| Building characteristics | Floor area                        | 30           |
| Building characteristics | Guestrooms                        | 21           |
| Building characteristics | Star level                        | 5            |
| Building characteristics | Construction year                 | 5            |
| Building characteristics | Building age                      | 4            |
| Building characteristics | Number of floors                  | 4            |
| Building characteristics | Guestrooms area                   | 3            |
| Building characteristics | Retrofit                          | 3            |
| Economics                | Occupancy                         | 21           |
| Economics                | Guest-nights                      | 8            |
| Economics                | Number of guests                  | 5            |
| Economics                | Food covers                       | 4            |
| Economics                | Room revenue                      | 4            |
| Social                   | Number of employees               | 7            |
| Social                   | Employees density                 | 4            |
| environmental            | Carbon emissions                  | 3            |
| environmental            | Outdoor temperature               | 3            |
| environmental            | Water use                         | 3            |
| Building characteristics | GFA/guestrooms                    | 2            |
| Building characteristics | Building area                     | 2            |
| Economics                | Operation cost                    | 2            |
| Economics                | revenue                           | 2            |
| Economics                | food and beverage revenue         | 2            |
| Building characteristics | laundry                           | 1            |
| Building characteristics | 5 star                            | 1            |
| Building characteristics | 4 star                            | 1            |
| Building characteristics | 3 star                            | 1            |
| Building characteristics | restaurants                       | 1            |
| Building characteristics | Garden area                       | 1            |
| Building characteristics | pools (volume)                    | 1            |
| Building characteristics | pools (area)                      | 1            |
| Building characteristics | pools (temperature)               | 1            |
| Building characteristics | aircon                            | 1            |
| Building characteristics | spa                               | 1            |
| Building characteristics | Kitchenette in room               | 1            |
| Building characteristics | travelife certified               | 1            |
| Building characteristics | addicional services areas         | 1            |
| Building characteristics | group of guests                   | 1            |
| Building characteristics | number of beds                    | 1            |
| Building characteristics | Building stories                  | 1            |
| Building characteristics | (%) of GFA with dining facilities | 1            |
| Building characteristics | (%) of GFA with retail shops      | 1            |
| Building characteristics | GFA/AIRCCOND                      | 1            |
| Building characteristics | Illumination of guestrooms        | 1            |
| Building characteristics | central air cond                  | 1            |
| Building characteristics | external wall type                | 1            |
| Building characteristics | window type                       | 1            |
| Economics                | Construction cost                 | 1            |
| Economics                | Maintenance cost replacement      | 1            |
| Economics                | custo total                       | 1            |
| Economics                | Maintenance cost                  | 1            |
| Economics                | rank of overnight                 | 1            |
| Economics                | Net return                        | 1            |
| Economics                | number of diners                  | 1            |
| Economics                | ADR                               | 1            |
| Economics                | number of repairs                 | 1            |
| Economics                | refrigerants reposition           | 1            |
| Economics                | equivalent rooms                  | 1            |

|               |                                      |   |
|---------------|--------------------------------------|---|
| environmental | Carbon emissions construction        | 1 |
| environmental | Carbon emission operation            | 1 |
| environmental | Carbon emissions replacement         | 1 |
| environmental | Loss rate                            | 1 |
| environmental | energy audit                         | 1 |
| environmental | cold water temperature               | 1 |
| environmental | renewable energy                     | 1 |
| environmental | recycled kitchen oil                 | 1 |
| environmental | recycled cardboard*                  | 1 |
| environmental | cooling temperature                  | 1 |
| environmental | heating degree days                  | 1 |
| environmental | RDD                                  | 1 |
| Social        | Tourist number                       | 1 |
| Social        | workers per shift                    | 1 |
| Social        | average room rate                    | 1 |
| Social        | guest per room                       | 1 |
| Social        | GRI                                  | 1 |
| Social        | number of adult guests               | 1 |
| Social        | number of children guests            | 1 |
| Social        | bangkok                              | 1 |
| Social        | location district                    | 1 |
| Social        | guest of foreing independent tourist | 1 |
| Social        | guest of group                       | 1 |
| Social        | guests from taiwan                   | 1 |
| Social        | guests from china                    | 1 |
| Social        | guests from north america            | 1 |
| Social        | guests from japan                    | 1 |
| Social        | guest from europe                    | 1 |
