# Supplementary material for: Energy use and its contributors in hotel buildings: A systematic review and meta-analysis
Source: PubMed Central journal article supplement (PMC11500959; doi:10.1371/journal.pone.0309745), 2024-10-24
Supplement: pone.0309745.s004.pdf [file pone.0309745.s004.pdf]

S6 Table. Subgroup analyses for the three variables with more than 10 studies

| Contributor              | Moderators               | k                        | Subgroup        | r              | 95%-CI            | Q                 | T      | I <sup>2</sup> (%) | p-value |        |
|--------------------------|--------------------------|--------------------------|-----------------|----------------|-------------------|-------------------|--------|--------------------|---------|--------|
| Floor area               | Statistical significance | 13                       | Significant     | 0.7600         | [0.5379; 0.8834]  | 260.80            | 0.6866 | 95.4               | 0.1213  |        |
|                          |                          | 17                       | No significant  | 0.5417         | [-0.3022; 0.7169] | 255.80            | 0.5896 | 93.7               |         |        |
|                          | Hotel category           | 25                       | General         | 0.6666         | [0.4909; 0.7903]  | 480.2             | 0.6460 | 95.0               | 0.4835  |        |
|                          |                          | 5                        | Upscale         | 0.5391         | [0.1054; 0.8005]  | 51.65             | 0.5412 | 92.3               |         |        |
|                          | Type of energy indicator | 18                       | raw energy      | 0.8419         | [0.7887; 0.8826]  | 72.42             | 0.2823 | 76.5               | <0.0001 |        |
|                          |                          | 12                       | EUI             | 0.1359         | [-0.0098; 0.2759] | 30.79             | 0.1942 | 64.3               |         |        |
|                          | Main method              | 25                       | Regression      | 0.6408         | [0.4603; 0.7704]  | 491.99            | 0.6326 | 95.1               | 0.8502  |        |
|                          |                          | 5                        | Correlation     | 0.6743         | [0.2593; 0.8791]  | 43.89             | 0.6004 | 90.9               |         |        |
|                          | Journal quality          | 7                        | A (jcr > 2)     | 0.5513         | [-0.0893; 0.8693] | 77.36             | 0.9125 | 92.2               | 0.8835  |        |
|                          |                          | 12                       | B (> 1 jcr < 2) | 0.6763         | [0.4035; 0.8386]  | 368.84            | 0.6795 | 97.0               |         |        |
|                          |                          | 11                       | C (jcr < 1)     | 0.6626         | [0.4723; 0.7939]  | 78.95             | 0.4370 | 87.3               |         |        |
|                          | Climate Zone             | 4                        | Equatorial      | 0.6266         | [-0.1153; 0.9198] | 57.77             | 0.8462 | 94.8               | 0.7592  |        |
|                          |                          | 8                        | Tropical        | 0.7639         | [0.4483; 0.9101]  | 219.10            | 0.7186 | 96.8               |         |        |
|                          |                          | 8                        | Sub-tropical    | 0.5950         | [0.0683; 0.8623]  | 86.34             | 0.8450 | 91.9               |         |        |
|                          |                          | 10                       | Temperate       | 0.5867         | [0.3317; 0.7618]  | 150.96            | 0.5105 | 94.0               |         |        |
|                          | Continent zone           | 17                       | Asia            | 0.6905         | [0.4483; 0.8382]  | 353.58            | 0.7362 | 95.5               | 0.7685  |        |
|                          |                          | 10                       | Europe          | 0.5867         | [0.3317; 0.7618]  | 150.96            | 0.5105 | 94.0               |         |        |
|                          |                          | 3                        | Africa          | 0.5829         | [-0.2105; 0.9133] | 16.44             | 0.7027 | 87.8               |         |        |
|                          | Energy source            | 25                       | Electricity     | 0.6307         | [0.4451; 0.7643]  | 497.92            | 0.6398 | 95.2               | 0.7838  |        |
|                          |                          | 3                        | Diesel          | 0.7098         | [-0.1074; 0.9546] | 25.99             | 0.8374 | 92.3               |         |        |
|                          |                          | 2                        | Gas             | 0.7448         | [0.3590; 0.9132]  | 8.56              | 0.3969 | 88.3               |         |        |
|                          | Decade years             | 16                       | 2000            | 0.6254         | [0.3883; 0.7849]  | 244.07            | 0.6254 | 93.9               | 0.6562  |        |
|                          |                          | 11                       | 2010            | 0.6387         | [0.3150; 0.8293]  | 274.03            | 0.7054 | 96.4               |         |        |
|                          |                          | 3                        | 2020            | 0.7635         | [0.4656; 0.9060]  | 8.84              | 0.3615 | 77.4               |         |        |
|                          | Guestrooms               | Statistical significance | 8               | Significant    | 0.7005            | [0.3672; 0.8744]  | 174.79 | 0.6570             | 96.0    | 0.0678 |
|                          |                          |                          | 13              | No significant | 0.3619            | [0.1720; 0.5259]  | 61.27  | 0.3332             | 80.4    |        |
|                          |                          | Hotel category           | 16              | General        | 0.5605            | [0.3317; 0.7271]  | 268.08 | 0.5575             | 94.4    | 0.1566 |
|                          |                          |                          | 5               | Upscale        | 0.2844            | [-0.0807; 0.5822] | 15.50  | 0.3655             | 74.2    |        |
| Type of energy indicator |                          | 13                       | raw energy      | 0.6614         | [0.4596; 0.7983]  | 153.69            | 0.5104 | 92.2               | 0.0004  |        |
|                          |                          | 8                        | EUI             | 0.1785         | [0.0195; 0.3287]  | 13.75             | 0.1551 | 49.1               |         |        |
| Main method              |                          | 15                       | Regression      | 0.5863         | [-0.0002; 0.4876] | 253.30            | 0.5842 | 94.5               | 0.0528  |        |
|                          |                          | 6                        | Correlation     | 0.2602         | [0.3449; 0.7550]  | 16.42             | 0.2706 | 69.6               |         |        |
| Journal quality          |                          | 13                       | A (jcr > 2)     | 0.4747         | [0.1486; 0.7076]  | 268.72            | 0.6479 | 95.5               | 0.6948  |        |
|                          |                          | 8                        | B (jcr < 2)     | 0.5417         | [0.3287; 0.7023]  | 33.97             | 0.3275 | 79.4               |         |        |
| Climate Zone             |                          | 4                        | Equatorial      | 0.5488         | [0.0828; 0.8179]  | 22.69             | 0.5073 | 86.8               | 0.0302  |        |
|                          |                          | 9                        | Tropical        | 0.6267         | [0.2917; 0.8248]  | 202.44            | 0.6275 | 96.0               |         |        |
|                          |                          | 3                        | Sub-tropical    | 0.0674         | [-0.1980; 0.3236] | 3.03              | 0.1383 | 34.1               |         |        |
|                          |                          | 5                        | Temperate       | 0.4534         | [0.1635; 0.6712]  | 22.77             | 0.3342 | 82.4               |         |        |
| Continent zone           |                          | 12                       | Asia            | 0.5238         | [0.1855; 0.7511]  | 250.56            | 0.6705 | 95.6               | 0.9371  |        |
|                          |                          | 5                        | Europe          | 0.4534         | [0.1635; 0.6712]  | 22.77             | 0.3342 | 82.4               |         |        |
|                          |                          | 4                        | Africa          | 0.4725         | [0.1585; 0.6997]  | 9.32              | 0.2798 | 67.8               |         |        |
| Energy source            |                          | 18                       | Electricity     | 0.5025         | [0.2634; 0.6835]  | 293.77            | 0.5782 | 94.2               | 0.9297  |        |
|                          |                          | 3                        | Diesel or Gas   | 0.5212         | [0.0927; 0.7868]  | 11.29             | 0.3880 | 82.3               |         |        |
|                          |                          | 7                        | 2000            | 0.4520         | [0.1760; 0.6621]  | 35.51             | 0.3787 | 83.1               |         |        |
| Decade years             |                          | 11                       | 2010            | 0.5021         | [0.1311; 0.7497]  | 244.79            | 0.6857 | 95.9               | 0.7416  |        |
|                          |                          | 3                        | 2020            | 0.5729         | [0.3512; 0.7337]  | 4.17              | 0.1749 | 52.1               |         |        |
|                          |                          | 8                        | Significant     | 0.2417         | [-0.1619; 0.5760] | 119.52            | 0.5408 | 94.1               |         |        |
| Occupancy                |                          | Statistical significance | 13              | No significant | 0.1896            | [0.0414; 0.4013]  | 50.75  | 0.3558             | 76.4    | 0.8202 |
|                          |                          |                          | 15              | General        | 0.3557            | [0.1153; 0.5567]  | 149.27 | 0.4513             | 90.6    |        |
|                          |                          | Hotel category           | 6               | Upscale        | -0.2125           | [-0.5237; 0.1487] | 17.54  | 0.3741             | 71.5    | 0.0099 |
|                          |                          |                          | 12              | raw energy     | 0.2411            | [-0.0638; 0.5048] | 113.19 | 0.4921             | 90.3    |        |
|                          |                          | Type of energy indicator | 9               | EUI            | 0.1371            | [-0.2582; 0.4931] | 86.70  | 0.5608             | 90.8    | 0.6770 |
|                          | 14                       |                          | Regression      | 0.3068         | [0.0376; 0.5345]  | 124.33            | 0.4692 | 89.5               |         |        |
|                          | Main method              | 7                        | Correlation     | -0.0363        | [-0.2365; 0.1669] | 13.13             | 0.0374 | 54.3               | 0.0456  |        |
|                          |                          | 4                        | A (jcr > 2)     | 0.1703         | [-0.4800; 0.6998] | 26.37             | 0.6616 | 88.6               |         |        |
|                          | Journal quality          | 10                       | B (> 1 jcr < 2) | 0.3284         | [0.0545; 0.5563]  | 105.83            | 0.4257 | 91.5               | 0.3759  |        |
|                          |                          | 7                        | C (jcr < 1)     | 0.0147         | [-0.3308; 0.3566] | 21.42             | 0.3750 | 72.0               |         |        |
|                          |                          | 5                        | Equatorial      | 0.3258         | [-0.0894; 0.6445] | 19.56             | 0.4287 | 79.6               |         |        |
|                          | Climate Zone             | 11                       | Tropical        | 0.1685         | [-0.1491; 0.4546] | 144.52            | 0.4868 | 93.1               | 0.9198  |        |
|                          |                          | 4                        | Sub-tropical    | 0.1703         | [-0.4800; 0.6998] | 26.37             | 0.6616 | 88.6               |         |        |
|                          |                          | 1                        | Temperate       | 0.1240         | [-0.4352; 0.6142] | NA                | NA     | NA                 |         |        |
|                          |                          | 14                       | Asia            | 0.2969         | [0.0271; 0.5264]  | 153.96            | 0.4929 | 91.6               |         |        |
|                          | Continent zone           | 1                        | Europe          | 0.1240         | [-0.4352; 0.6142] | NA                | NA     | NA                 | 0.2874  |        |
|                          |                          | 6                        | Africa          | -0.0407        | [-0.3541; 0.2808] | 13.54             | 0.2949 | 63.1               |         |        |
|                          |                          | 19                       | Electricity     | 0.2296         | [-0.0152; 0.4484] | 197.75            | 0.4948 | 90.9               |         |        |
|                          | Energy source            | 2                        | Diesel          | -0.0449        | [-0.3113; 0.2282] | 0.36              | 0.0000 | 0.0                | 0.1428  |        |
|                          |                          | 5                        | 2000            | 0.5442         | [0.2191; 0.7605]  | 12.24             | 0.3572 | 67.3               |         |        |
|                          |                          | 13                       | 2010            | 0.0439         | [-0.2625; 0.3423] | 170.34            | 0.5337 | 93.00              |         |        |
|                          | Decade years             | 3                        | 2020            | 0.1593         | [-0.2145; 0.4923] | 2.85              | 0.2125 | 29.9               | 0.0749  |        |
