# Supplementary material for: Energy use and its contributors in hotel buildings: A systematic review and meta-analysis
Source: PubMed Central journal article supplement (PMC11500959; doi:10.1371/journal.pone.0309745), 2024-10-24
Supplement: pone.0309745.s005.pdf [file pone.0309745.s005.pdf]

S7 Table. Complete cumulative meta-analyses

| Cumulative meta-analysis of floor area per energy data type (raw to EUI) |    |        |                  |         |        |                    |
|--------------------------------------------------------------------------|----|--------|------------------|---------|--------|--------------------|
| Added study                                                              | k  | r      | 95% C.I.         | p-value | T      | I <sup>2</sup> (%) |
| Chan and Lam (2002) a                                                    | 1  | 0.9350 | [0.8252; 0.9767] | <0.0001 | NA     | NA                 |
| Chan and Lam (2002) b                                                    | 2  | 0.9296 | [0.8447; 0.9688] | <0.0001 | 0.0000 | 0.0                |
| Deng (2003)                                                              | 3  | 0.8883 | [0.7718; 0.9471] | <0.0001 | 0.2242 | 42.0               |
| Chan and Mak (2004)                                                      | 4  | 0.9020 | [0.8118; 0.9502] | <0.0001 | 0.2184 | 37.3               |
| Alujevic' (2006) a                                                       | 5  | 0.8709 | [0.7331; 0.9401] | <0.0001 | 0.3760 | 72.4               |
| Alujevic' (2006) b                                                       | 6  | 0.8366 | [0.6947; 0.9158] | <0.0001 | 0.3644 | 73.5               |
| Bohdanowicz and Martinac (2007) a                                        | 7  | 0.8323 | [0.7252; 0.9001] | <0.0001 | 0.2992 | 70.8               |
| Bohdanowicz and Martinac (2007) b                                        | 8  | 0.8373 | [0.7531; 0.8945] | <0.0001 | 0.2652 | 71.5               |
| Priyadarsini et al. (2009) a                                             | 9  | 0.8597 | [0.7814; 0.9114] | <0.0001 | 0.3091 | 76.9               |
| Wang (2012) a                                                            | 10 | 0.8700 | [0.8019; 0.9158] | <0.0001 | 0.3137 | 82.4               |
| Kong et al. (2012)                                                       | 11 | 0.8624 | [0.7949; 0.9088] | <0.0001 | 0.3121 | 81.6               |
| Lai (2016) a                                                             | 12 | 0.8477 | [0.7714; 0.8999] | <0.0001 | 0.3424 | 83.8               |
| Oluseyi et al. (2016) a                                                  | 13 | 0.8424 | [0.7686; 0.8940] | <0.0001 | 0.3364 | 82.9               |
| Tangon et al. (2018)                                                     | 14 | 0.8401 | [0.7726; 0.8888] | <0.0001 | 0.3181 | 81.8               |
| Nguyen and Rockwood (2019) a                                             | 15 | 0.8378 | [0.7730; 0.8853] | <0.0001 | 0.3117 | 80.6               |
| Nguyen and Rockwood (2019) b                                             | 16 | 0.8412 | [0.7823; 0.8852] | <0.0001 | 0.2991 | 79.3               |
| Santiago (2021)                                                          | 17 | 0.8414 | [0.7838; 0.8847] | <0.0001 | 0.2957 | 77.9               |
| Stimac et al. (2023) a                                                   | 18 | 0.8419 | [0.7887; 0.8826] | <0.0001 | 0.2823 | 76.5               |
| Chan and Lam (2002) c                                                    | 19 | 0.8202 | [0.7483; 0.8731] | <0.0001 | 0.3622 | 83.8               |
| Chan and Lam (2002) d                                                    | 20 | 0.7955 | [0.7063; 0.8598] | <0.0001 | 0.4156 | 86.8               |
| Alujevic' (2006) c                                                       | 21 | 0.7735 | [0.6623; 0.8513] | <0.0001 | 0.4944 | 90.5               |
| Alujevic' (2006) d                                                       | 22 | 0.7548 | [0.6329; 0.8401] | <0.0001 | 0.5230 | 91.3               |
| Bohdanowicz and Martinac (2007) c                                        | 23 | 0.7402 | [0.6104; 0.8313] | <0.0001 | 0.5482 | 92.3               |
| Bohdanowicz and Martinac (2007) c                                        | 24 | 0.7235 | [0.5806; 0.8231] | <0.0001 | 0.5896 | 93.7               |
| Priyadarsini et al. (2009) b                                             | 25 | 0.7086 | [0.5622; 0.8119] | <0.0001 | 0.5949 | 93.7               |
| Wang (2012) b                                                            | 26 | 0.6932 | [0.5375; 0.8031] | <0.0001 | 0.6234 | 94.9               |
| Lai (2016) b                                                             | 27 | 0.6730 | [0.5111; 0.7887] | <0.0001 | 0.6326 | 94.9               |
| Oluseyi et al. (2016) b                                                  | 28 | 0.6551 | [0.4893; 0.7752] | <0.0001 | 0.6376 | 94.9               |
| Tang et al. (2016)                                                       | 29 | 0.6489 | [0.4856; 0.7684] | <0.0001 | 0.6328 | 94.8               |
| Stimac et al. (2023) b                                                   | 30 | 0.6465 | [0.4890; 0.7632] | <0.0001 | 0.6207 | 94.6               |

Cumulative meta-analysis of number of guestrooms per sample size

| Added study                  | k  | r      | 95% C.I.          | p-value | T      | I <sup>2</sup> (%) |
|------------------------------|----|--------|-------------------|---------|--------|--------------------|
| Santiago (2021)              | 1  | 0.7940 | [-0.0494; 0.9764] | 0.0609  | NA     | NA                 |
| Xin et al. (2012) a          | 2  | 0.7049 | [0.4031; 0.8684]  | 0.0001  | 0.0000 | 0.0                |
| Xin et al. (2012) b          | 3  | 0.5197 | [-0.0490; 0.8339] | 0.0709  | 0.4357 | 65.6               |
| Tang et al. (2016)           | 4  | 0.5323 | [0.1882; 0.7600]  | 0.0039  | 0.2896 | 52.0               |
| Kong et al. (2012)           | 5  | 0.5383 | [0.3031; 0.7117]  | <0.0001 | 0.1977 | 37.0               |
| Oluseyi et al. (2016) a      | 6  | 0.5761 | [0.3902; 0.7168]  | <0.0001 | 0.1766 | 34.3               |
| Oluseyi et al. (2016) b      | 7  | 0.5042 | [0.2631; 0.6860]  | 0.0001  | 0.2923 | 60.5               |
| Priyadarsini et al. (2009) a | 8  | 0.5783 | [0.3311; 0.7512]  | <0.0001 | 0.3807 | 73.4               |
| Priyadarsini et al. (2009) b | 9  | 0.5480 | [0.3177; 0.7173]  | <0.0001 | 0.3646 | 72.5               |
| Deng (2003)                  | 10 | 0.5180 | [0.2997; 0.6848]  | <0.0001 | 0.3543 | 72.0               |
| Lai (2016) a                 | 11 | 0.4867 | [0.2753; 0.6533]  | <0.0001 | 0.3513 | 72.3               |
| Lai (2016) b                 | 12 | 0.4362 | [0.2042; 0.6218]  | 0.0004  | 0.3973 | 77.4               |
| Alujevic' (2006) c           | 13 | 0.4576 | [0.2453; 0.6281]  | <0.0001 | 0.3863 | 76.8               |
| Alujevic' (2006) d           | 14 | 0.4334 | [0.2292; 0.6011]  | <0.0001 | 0.3787 | 76.5               |
| Stimac et al. (2023)         | 15 | 0.4546 | [0.2658; 0.6098]  | <0.0001 | 0.3710 | 77.0               |
| Alujevic' (2006) a           | 16 | 0.4641 | [0.2939; 0.6058]  | <0.0001 | 0.3475 | 75.9               |
| Alujevic' (2006) b           | 17 | 0.4405 | [0.2703; 0.5840]  | <0.0001 | 0.3546 | 77.7               |
| Tangon et al. (2018)         | 18 | 0.4658 | [0.3005; 0.6040]  | <0.0001 | 0.3680 | 79.9               |
| Mechri and Amara (2021)      | 19 | 0.4644 | [0.3166; 0.5901]  | <0.0001 | 0.3347 | 78.7               |
| Wang (2012) a                | 20 | 0.5151 | [0.2929; 0.6845]  | <0.0001 | 0.5762 | 93.0               |
| Wang (2012) b                | 21 | 0.5047 | [0.2952; 0.6679]  | <0.0001 | 0.5531 | 93.5               |

Cumulative meta-analysis of hotels occupancy per sample size

| Added study                  | k  | r       | 95% C.I.           | p-value | T      | I <sup>2</sup> (%) |
|------------------------------|----|---------|--------------------|---------|--------|--------------------|
| Perez et al. (2016)          | 1  | -0.9497 | [-0.9946; -0.6025] | 0.0015  | NA     | NA                 |
| Santiago (2021)              | 2  | -0.6090 | [-0.9940; 0.9035]  | 0.5282  | 1.4771 | 86.7               |
| Okpala et al. (2023)         | 3  | -0.2316 | [-0.9357; 0.8428]  | 0.7526  | 1.1895 | 84.7               |
| Chan and Lam (2002) a        | 4  | 0.0029  | [-0.7556; 0.7581]  | 0.9955  | 0.8911 | 79.6               |
| Alujevic' (2006)             | 5  | 0.0560  | [-0.5668; 0.6381]  | 0.8750  | 0.6686 | 72.9               |
| Chan and Lam (2002) b        | 6  | 0.2424  | [-0.3704; 0.7082]  | 0.4462  | 0.6828 | 77.2               |
| Xin et al. (2012) a          | 7  | 0.2211  | [-0.2904; 0.6343]  | 0.4003  | 0.5952 | 74.9               |
| Xin et al. (2012) b          | 8  | 0.2559  | [-0.1683; 0.6002]  | 0.2347  | 0.5082 | 70.8               |
| Tang et al. (2016)           | 9  | 0.2918  | [-0.0604; 0.5793]  | 0.1027  | 0.4363 | 66.9               |
| Kong et al. (2012)           | 10 | 0.2647  | [-0.0490; 0.5308]  | 0.097   | 0.4034 | 65.8               |
| Oluseyi et al. (2016) a      | 11 | 0.2216  | [-0.0712; 0.4793]  | 0.1366  | 0.3948 | 66.9               |
| Oluseyi et al. (2016) b      | 12 | 0.2054  | [-0.0561; 0.4406]  | 0.1226  | 0.3608 | 64.5               |
| Priyadarsini et al. (2009) a | 13 | 0.2704  | [-0.0067; 0.5090]  | 0.0556  | 0.4311 | 73.4               |
| Priyadarsini et al. (2009) b | 14 | 0.2722  | [-0.0228; 0.4897]  | 0.0328  | 0.3977 | 71.3               |
| Lai (2016) a                 | 15 | 0.2175  | [-0.0413; 0.4489]  | 0.0987  | 0.4350 | 75.7               |
| Lai (2016) b                 | 16 | 0.1737  | [-0.0830; 0.4088]  | 0.1836  | 0.4492 | 77.5               |
| Nguyen and Rockwood (2019)   | 17 | 0.1624  | [-0.0711; 0.3790]  | 0.1718  | 0.4159 | 76.4               |
| Tangon et al. (2018)         | 18 | 0.1333  | [-0.0890; 0.3430]  | 0.2392  | 0.4079 | 77.6               |
| Mechri and Amara (2021)      | 19 | 0.1233  | [-0.0713; 0.3090]  | 0.2137  | 0.3578 | 76.5               |
| Wang (2012) a                | 20 | 0.1632  | [-0.0616; 0.3723]  | 0.1538  | 0.4533 | 86.9               |
| Wang (2012) b                | 21 | 0.2029  | [-0.0276; 0.4129]  | 0.0839  | 0.4882 | 90.4               |
