# Supplementary material for: Energy use and its contributors in hotel buildings: A systematic review and meta-analysis
Source: PubMed Central journal article supplement (PMC11500959; doi:10.1371/journal.pone.0309745), 2024-10-24
Supplement: pone.0309745.s006.pdf [file pone.0309745.s006.pdf]

S8 Table. Estimate of cumulative evidence from the studies included in meta-analysis

| Number                     | Study                                                                                                                                              | Year | Study site | Sample size | Theory support | Period of analysis | Type of data | Cumulative evidence | Observation               |
|----------------------------|----------------------------------------------------------------------------------------------------------------------------------------------------|------|------------|-------------|----------------|--------------------|--------------|---------------------|---------------------------|
| 1                          | Silu Bhochhibhoya, Massimo Pizzol, Francesco Marinello, Raffaele Cavalli                                                                           | 2020 | 10         | 2.3         | 10             | 5                  | 5            | NA                  | Not used in meta-analysis |
| 2                          | Hyerim Yoon, David Sauri, Antonio Rico                                                                                                             | 2021 | 10         | 0.6         | 10             | 5                  | 10           | 71%                 | Used in meta-analysis     |
| 3                          | Rodrigo Schons Arenhart, Adriano Mendonça Souza, Roselaine Ruviano Zanini                                                                          | 2022 | 1          | 2.3         | 5              | 5                  | 5            | 37%                 | Used in meta-analysis     |
| 4                          | Anh Tuan Nguyen, David Rockwood                                                                                                                    | 2019 | 10         | 2.5         | 5              | 5                  | 10           | 65%                 | Used in meta-analysis     |
| 5                          | Joseph H. K. Lai                                                                                                                                   | 2016 | 5          | 1.5         | 5              | 5                  | 10           | 53%                 | Used in meta-analysis     |
| 6                          | Wu Xuchao, Rajagopalan Priyadarsini, Lee Siew Eang                                                                                                 | 2010 | 5          | 1.5         | 5              | 5                  | 5            | NA                  | Not used in meta-analysis |
| 7                          | P. O. Oluseyi, O. M. Babatunde, O. A. Babatunde                                                                                                    | 2016 | 10         | 1.4         | 5              | 5                  | 10           | 63%                 | Used in meta-analysis     |
| 8                          | Dunia E. Santiago                                                                                                                                  | 2021 | 8          | 0.3         | 5              | 5                  | 10           | 57%                 | Used in meta-analysis     |
| 9                          | Wilco W. Chan, Barry L. Mak                                                                                                                        | 2004 | 5          | 0.5         | 5              | 10                 | 5            | 51%                 | Used in meta-analysis     |
| 10                         | Wilco W. Chan, Joseph C. Lam                                                                                                                       | 2002 | 5          | 0.9         | 5              | 10                 | 5            | 52%                 | Used in meta-analysis     |
| 11                         | Suwajee Tangon, Jaruwat Chontanawat, Siriluk Chiarakorn                                                                                            | 2018 | 5          | 3.2         | 5              | 5                  | 10           | 56%                 | Used in meta-analysis     |
| 12                         | Francisco Javier Diaz Perez, David Chinarro, Adib Guardiola Mouhaffel, Ricardo Diaz Martin, Rosa Pino Otin                                         | 2016 | 8          | 0.3         | 5              | 10                 | 10           | 67%                 | Used in meta-analysis     |
| 13                         | Yajuan Xin, Shilei Lu, Neng Zhu, Wei Wu                                                                                                            | 2012 | 8          | 1.0         | 10             | 5                  | 10           | 68%                 | Used in meta-analysis     |
| 14                         | Mingfang Tang, Xiao Fu, Huiming Cao, Yuan Shen, Hongbing Deng, Gang Wu                                                                             | 2016 | 8          | 1.2         | 5              | 5                  | 10           | 58%                 | Used in meta-analysis     |
| 15                         | Rajagopalan Priyadarsini, Wu Xuchao, Lee Siew Eang                                                                                                 | 2009 | 5          | 1.5         | 5              | 5                  | 10           | 53%                 | Used in meta-analysis     |
| 16                         | Paulina Bohdanowicz, Ivo Martinac                                                                                                                  | 2007 | 3          | 5.6         | 5              | 5                  | 5            | 47%                 | Used in meta-analysis     |
| 17                         | Jen Chun Wang, Kuo-Tsang Huang                                                                                                                     | 2013 | 5          | 1.7         | 5              | 5                  | 10           | 53%                 | Used in meta-analysis     |
| 18                         | Maja Štimac, Mario Matkovic, Daria Karasalihovic Sedlar                                                                                            | 2023 | 5          | 2.6         | 5              | 10                 | 10           | 65%                 | Used in meta-analysis     |
| 19                         | Silu Bhochhibhoya                                                                                                                                  | 2016 | 10         | 2.3         | 10             | 5                  | 10           | 75%                 | Used in meta-analysis     |
| 20                         | Houcem Eddine Mechri, Samir Amara                                                                                                                  | 2021 | 5          | 6.7         | 5              | 5                  | 10           | 63%                 | Used in meta-analysis     |
| 21                         | Jen Chun Wang                                                                                                                                      | 2012 | 5          | 10.0        | 5              | 5                  | 10           | 70%                 | Used in meta-analysis     |
| 22                         | George Papageorgiou, Andreas Efstathiades, Nicolas Nicolaou, Athanasios Maimaris                                                                   | 2018 | 5          | 0.6         | 5              | 5                  | 10           | 51%                 | Used in meta-analysis     |
| 23                         | Wilco W. Chan, Joseph C. Lam                                                                                                                       | 2002 | 5          | 0.6         | 5              | 10                 | 10           | 61%                 | Used in meta-analysis     |
| 24                         | Juan José Cabello Eras, Vladimir Sousa Santos, Alexis Sagastume Gutiérrez, Mario Álvarez Guerra Plasencia, Dries Haeseldonckx, Carlo Vandecasteele | 2016 | 8          | 0.1         | 5              | 5                  | 10           | NA                  | Not used in meta-analysis |
| 25                         | Xiangfei Kong, Shilei Lu, Ping Gao, Neng Zhu, Wei Wu, Xuming Gao                                                                                   | 2012 | 8          | 1.3         | 5              | 5                  | 5            | 49%                 | Used in meta-analysis     |
| 26                         | Shiming Deng                                                                                                                                       | 2003 | 5          | 1.5         | 5              | 10                 | 10           | 63%                 | Used in meta-analysis     |
| 27                         | Vlasta Zanki Alujevic                                                                                                                              | 2006 | 8          | 2.9         | 5              | 5                  | 10           | 62%                 | Used in meta-analysis     |
| 28                         | Chukwudi Okpala, Howard Njoku, Paul Ako                                                                                                            | 2023 | 10         | 0.5         | 5              | 5                  | 10           | 61%                 | Used in meta-analysis     |
| <b>Cumulative Evidence</b> |                                                                                                                                                    |      |            |             |                |                    |              | <b>59%</b>          |                           |
